# Supplementary material for: Subsurface Drip Irrigation with Emitters Placed at Suitable Depth Can Mitigate N2O Emissions and Enhance Chinese Cabbage Yield under Greenhouse Cultivation
Source: MDPI journal article supplement (doi:10.3390/agronomy12030745), 2022-03-20
Supplement: s1 [file s1]

## Article

# Subsurface drip irrigation with emitters placement at suitable depth can mitigate N<sub>2</sub>O emissions and enhance Chinese cabbage yield under greenhouse cultivation

Amar Ali Adam Hamad <sup>2</sup>, Qi Wei <sup>2,\*</sup>, Lijun Wan <sup>3</sup>, Junzeng Xu <sup>1,2</sup>, Yousef Alhaj Hamoud <sup>2</sup>, Yawei Li <sup>2</sup>, Hiba Shaghaleh <sup>4</sup>

<sup>1</sup> State Key Laboratory of Hydrology-Water Resources and Hydraulic Engineering, Hohai University, Nanjing 210098, China.

<sup>2</sup> College of Agricultural Science and Engineering, Hohai University, Nanjing 210098, China.

<sup>3</sup> Yixing Water Resources Bureau, Yixing, 214200, China.

<sup>4</sup> College of chemical engineering, Nanjing forestry university, Nanjing 210037, China.

\*Correspondence author: Qi Wei.

E-mail address: weiqi8855116@163.com

Telephone: +86 25 83786016

**Citation:** Hamad, A.A.A.; Wei, Q.; Wan, L.; Xu, J.; Hamoud, Y.A.; Li, Y.; Shaghaleh, H. Subsurface Drip Irrigation with Emitters Placed at Suitable Depth Can Mitigate N<sub>2</sub>O Emissions and Enhance Chinese Cabbage Yield under Greenhouse Cultivation. *Agronomy* **2022**, *12*, x. <https://doi.org/10.3390/agronomy12030745>

Received: 12 February 2022

Accepted: 17 March 2022

Published: 20 March 2022

**Publisher's Note:** MDPI stays neutral with regard to jurisdictional claims in published maps and institutional affiliations.

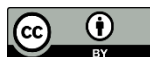

**Copyright:** © 2022 by the authors. Licensee MDPI, Basel, Switzerland. This article is an open access article distributed under the terms and conditions of the Creative Commons Attribution (CC BY) license (<http://creativecommons.org/licenses/by/4.0/>).

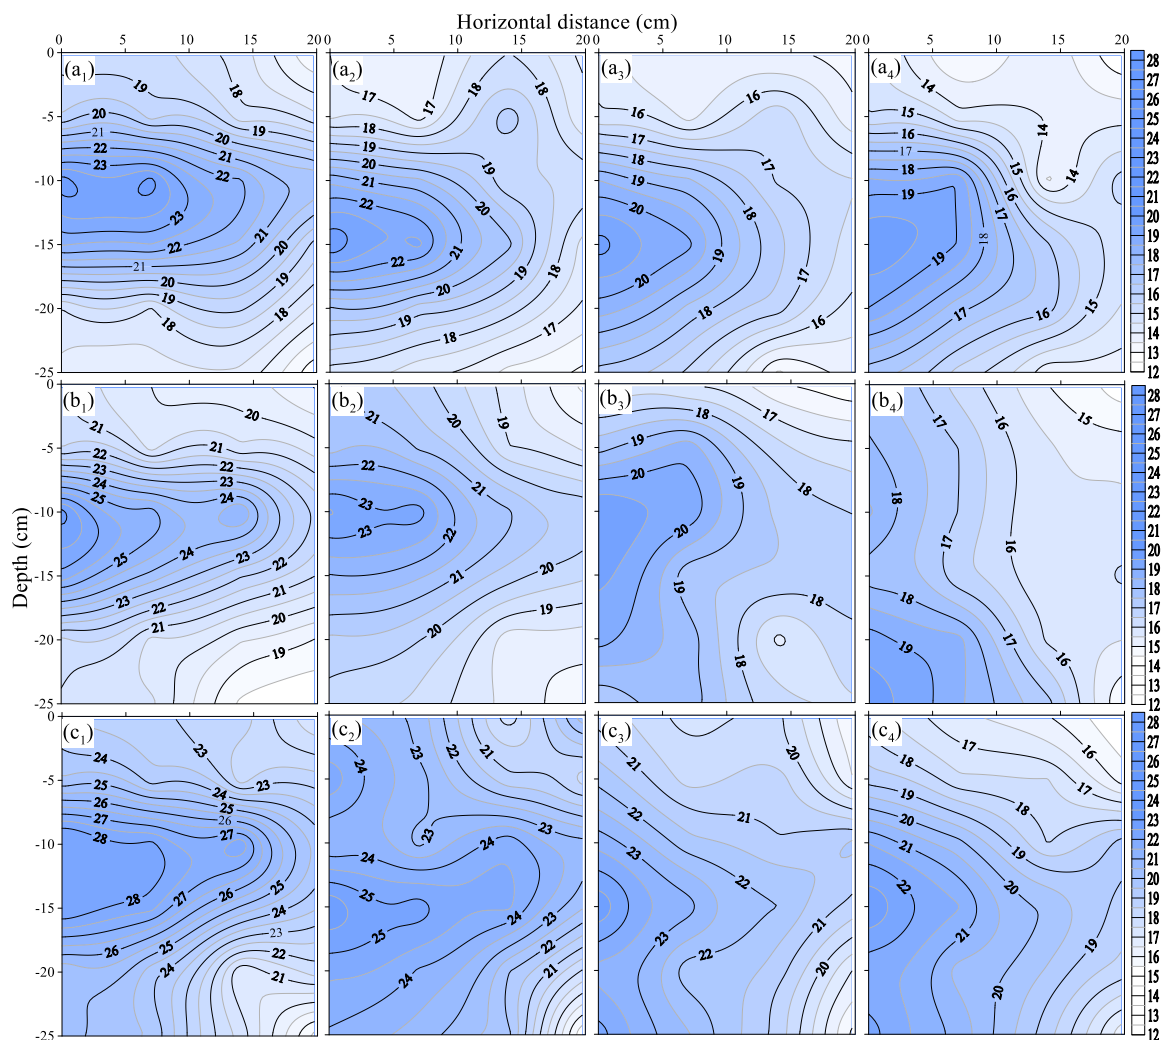

**Figure S1.** Soil moisture distribution under SDI<sub>10</sub>+N<sub>300</sub> treatment. letters a, b, and c represent first, second, and third irrigation events. The subscript numbers 1, 2, 3, and 4 denote sampling times of soil moisture subsequent to each irrigation.

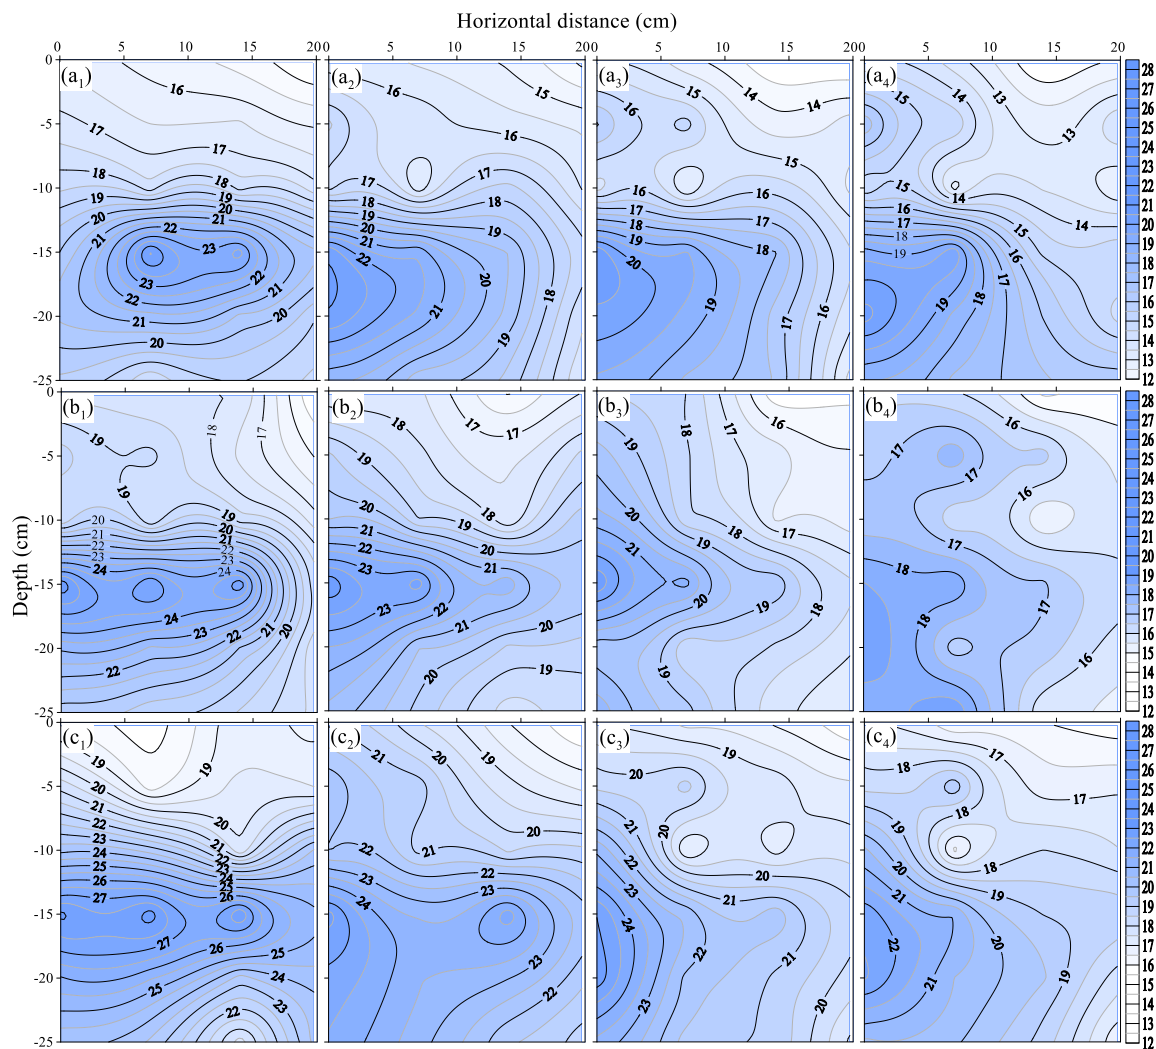

**Figure S2.** Soil moisture distribution under SDI<sub>15</sub>+N<sub>300</sub> treatment. letters a, b, and c represent first, second, and third irrigation events. The subscript numbers 1, 2, 3, and 4 denote sampling times of soil moisture within each irrigation.

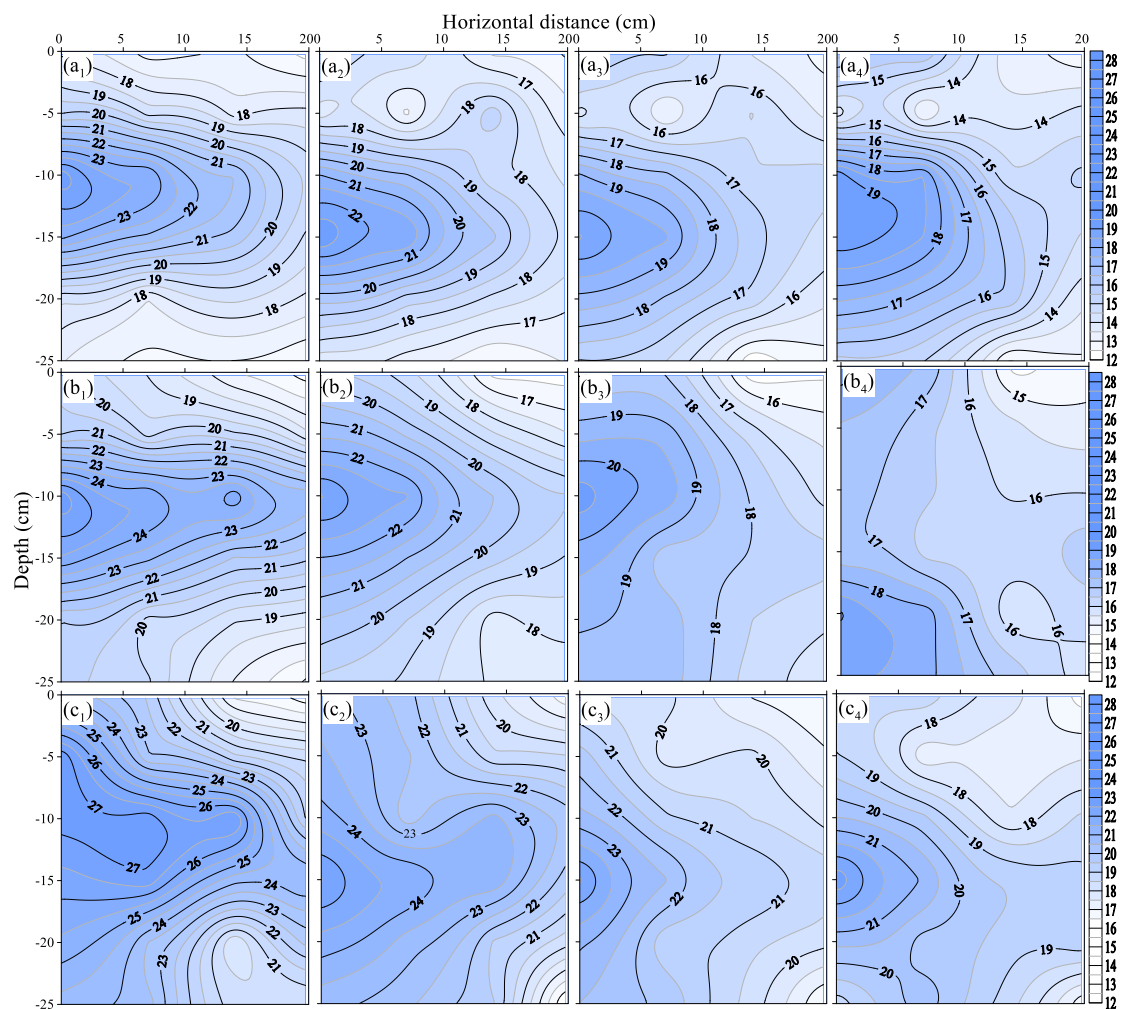

**Figure S3.** Soil moisture distribution under SDI<sub>10</sub>+N<sub>240</sub> treatment. letters a, b, and c represent first, second, and third irrigation events. The subscript numbers 1, 2, 3, and 4 denote sampling times of soil moisture subsequent to each irrigation.

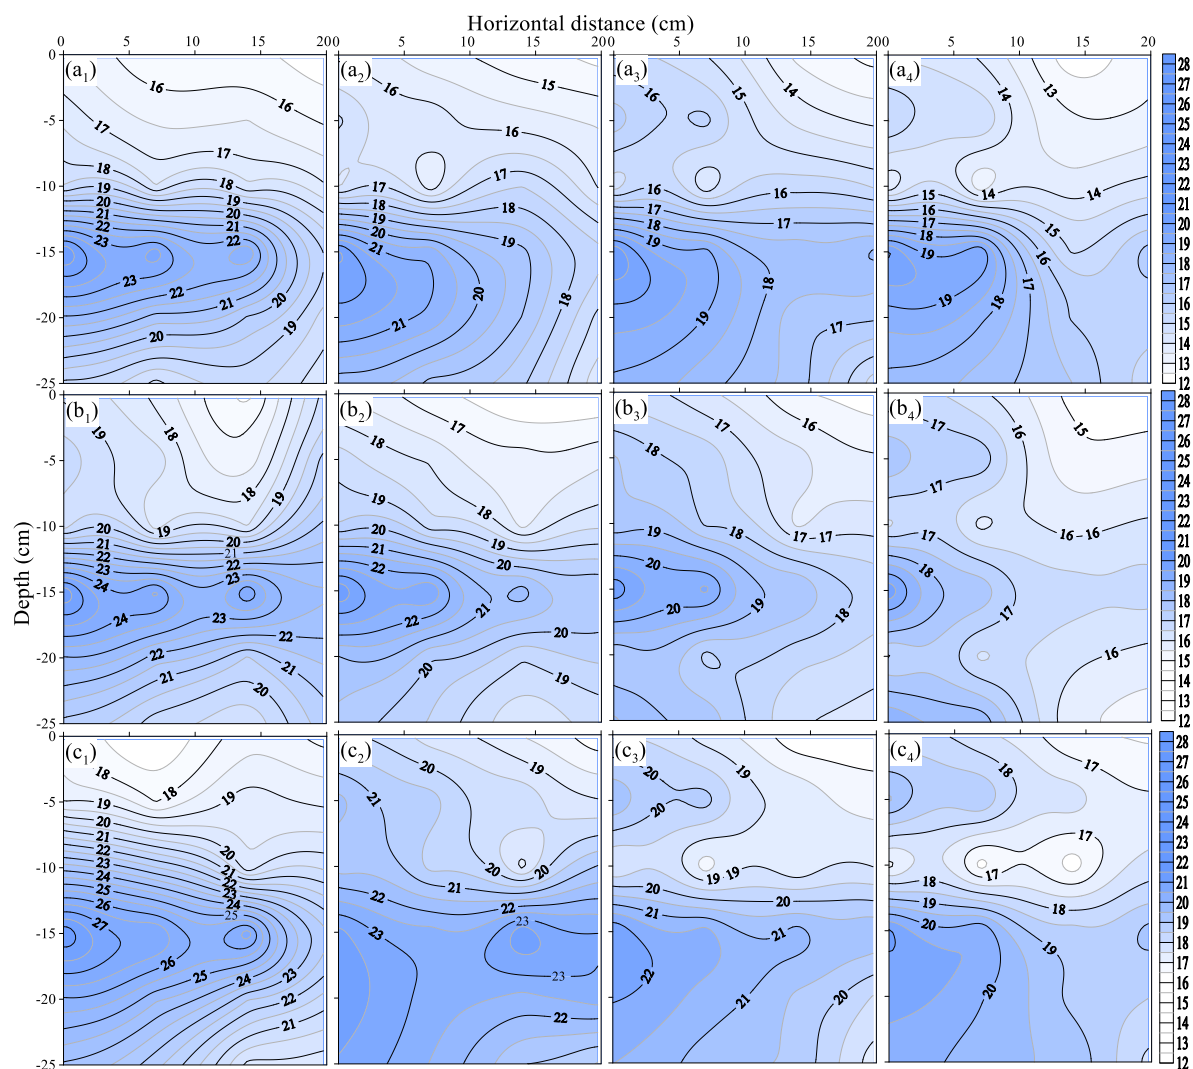

**Figure S4.** Soil moisture distribution under SDI<sub>15</sub>+N<sub>240</sub> treatment. letters a, b, and c represent first, second, and third irrigation events. The subscript numbers 1, 2, 3, and 4 denote sampling times of soil moisture within each irrigation.

**Table S1** Soil average  $\pm$  standard deviation of WFPS% for SDI<sub>5</sub> treatments.

| Treatment                          | Irrigation event | Horizontal distance (m) |                         |                         |                         |
|------------------------------------|------------------|-------------------------|-------------------------|-------------------------|-------------------------|
|                                    |                  | 0.07                    | 0.14                    | 0.20                    |                         |
| SDI <sub>5</sub> +N <sub>300</sub> | 1 <sup>st</sup>  | 1 <sup>st</sup>         | 20.6±0.9 <sup>Aa</sup>  | 19.8±0.9 <sup>Aa</sup>  | 20.0±0.9 <sup>Aa</sup>  |
|                                    |                  | 2 <sup>nd</sup>         | 20.1±0.9 <sup>Aab</sup> | 18.8±0.8 <sup>Ba</sup>  | 18.5±0.8 <sup>Bb</sup>  |
|                                    |                  | 3 <sup>rd</sup>         | 18.8±0.8 <sup>Abc</sup> | 17.2±0.7 <sup>ABa</sup> | 17.2±0.7 <sup>Bc</sup>  |
|                                    |                  | 4 <sup>th</sup>         | 17.1±0.7 <sup>Ac</sup>  | 15.1±0.7 <sup>Bb</sup>  | 15.5±0.7 <sup>Bd</sup>  |
|                                    | 2 <sup>nd</sup>  | 1 <sup>st</sup>         | 23.0±1.0 <sup>Ba</sup>  | 22.2±1.0 <sup>Ca</sup>  | 26.2±1.1 <sup>Aa</sup>  |
|                                    |                  | 2 <sup>nd</sup>         | 21.9±0.9 <sup>Bb</sup>  | 20.4±0.9 <sup>Bb</sup>  | 23.0±1.0 <sup>Ab</sup>  |
|                                    |                  | 3 <sup>rd</sup>         | 20.4±0.9 <sup>Ab</sup>  | 18.7±0.8 <sup>Bc</sup>  | 20.5±0.9 <sup>Ac</sup>  |
|                                    |                  | 4 <sup>th</sup>         | 18.4±0.8 <sup>Ac</sup>  | 16.7±0.7 <sup>Bd</sup>  | 18.7±0.8 <sup>Ad</sup>  |
|                                    | 3 <sup>rd</sup>  | 1 <sup>st</sup>         | 27.4±1.2 <sup>Ba</sup>  | 25.3±1.1 <sup>Ca</sup>  | 28.2±1.2 <sup>Aa</sup>  |
|                                    |                  | 2 <sup>nd</sup>         | 25.0±1.1 <sup>Ab</sup>  | 24.4±1.1 <sup>Aa</sup>  | 25.8±1.1 <sup>Ab</sup>  |
|                                    |                  | 3 <sup>rd</sup>         | 23.4±1.0 <sup>Ac</sup>  | 22.0±1.0 <sup>Bb</sup>  | 24.1±1.0 <sup>Ac</sup>  |
|                                    |                  | 4 <sup>th</sup>         | 21.8±0.9 <sup>Ad</sup>  | 19.8±0.9 <sup>Bc</sup>  | 22.5±1.0 <sup>Ad</sup>  |
| SDI <sub>5</sub> +N <sub>240</sub> | 1 <sup>st</sup>  | 1 <sup>st</sup>         | 20.3±0.9 <sup>Aa</sup>  | 19.6±0.8 <sup>Aa</sup>  | 19.8±0.8 <sup>Aa</sup>  |
|                                    |                  | 2 <sup>nd</sup>         | 19.9±0.8 <sup>Ab</sup>  | 18.8±0.8 <sup>Ab</sup>  | 18.6±0.8 <sup>Aa</sup>  |
|                                    |                  | 3 <sup>rd</sup>         | 18.8±0.8 <sup>Ab</sup>  | 17.5±0.7 <sup>ABb</sup> | 17.5±0.7 <sup>Bb</sup>  |
|                                    |                  | 4 <sup>th</sup>         | 17.4±0.7 <sup>Ac</sup>  | 15.8±0.7 <sup>Bc</sup>  | 16.1±0.7 <sup>ABb</sup> |
|                                    | 2 <sup>nd</sup>  | 1 <sup>st</sup>         | 22.2±0.9 <sup>Ba</sup>  | 21.6±0.9 <sup>Ca</sup>  | 24.8±1.0 <sup>Aa</sup>  |
|                                    |                  | 2 <sup>nd</sup>         | 21.3±0.9 <sup>Ab</sup>  | 21.1±0.8 <sup>Aa</sup>  | 22.2±0.9 <sup>Ab</sup>  |
|                                    |                  | 3 <sup>rd</sup>         | 20.1±0.9 <sup>Ac</sup>  | 18.7±0.8 <sup>Bb</sup>  | 20.2±0.9 <sup>Ab</sup>  |
|                                    |                  | 4 <sup>th</sup>         | 18.5±0.8 <sup>Ad</sup>  | 17.1±0.7 <sup>Ab</sup>  | 18.7±0.8 <sup>Ac</sup>  |
|                                    | 3 <sup>rd</sup>  | 1 <sup>st</sup>         | 25.8±1.1 <sup>Aa</sup>  | 24.1±1.0 <sup>Aa</sup>  | 26.4±1.1 <sup>Aa</sup>  |
|                                    |                  | 2 <sup>nd</sup>         | 23.8±1.0 <sup>Ab</sup>  | 23.3±1.0 <sup>Aa</sup>  | 24.5±1.0 <sup>Aab</sup> |
|                                    |                  | 3 <sup>rd</sup>         | 22.6±1.0 <sup>Ab</sup>  | 21.4±0.9 <sup>Ab</sup>  | 23.1±1.0 <sup>Ab</sup>  |
|                                    |                  | 4 <sup>th</sup>         | 21.2±0.9 <sup>Ac</sup>  | 19.6±0.8 <sup>Bb</sup>  | 21.8±0.9 <sup>Ac</sup>  |

Means of different uppercase letters (rows) indicate a significant difference at ( $p < 0.05$ ) according to LSD test of soil moisture among three horizontal distances (0.07, 0.14, and 0.20 m), while lowercase (columns) indicates a significant difference of soil moisture in four sampling times within each irrigation events (1<sup>st</sup>, 2<sup>nd</sup>, 3<sup>rd</sup>, and 4<sup>th</sup>) within each irrigation event. SDI<sub>5</sub>+N<sub>300</sub> and SDI<sub>5</sub>+N<sub>240</sub> are not significantly different.

**Table S2** Soil average  $\pm$  standard deviation of WFPS% for SDI<sub>10</sub> treatments.

| Treatment                           | Irrigation      | Sampling        | Horizontal distance (m)       |                               |                               |
|-------------------------------------|-----------------|-----------------|-------------------------------|-------------------------------|-------------------------------|
|                                     |                 |                 | 0.07                          | 0.14                          | 0.20                          |
| SDI <sub>10</sub> +N <sub>300</sub> | 1 <sup>st</sup> | 1 <sup>st</sup> | 19.6 $\pm$ 0.8 <sup>Aa</sup>  | 18.8 $\pm$ 0.8 <sup>Aa</sup>  | 19.0 $\pm$ 0.8 <sup>Aa</sup>  |
|                                     |                 | 2 <sup>nd</sup> | 19.2 $\pm$ 0.8 <sup>Aa</sup>  | 17.9 $\pm$ 0.8 <sup>Bb</sup>  | 17.7 $\pm$ 0.8 <sup>Ba</sup>  |
|                                     |                 | 3 <sup>rd</sup> | 17.9 $\pm$ 0.8 <sup>Ab</sup>  | 16.4 $\pm$ 0.7 <sup>ABb</sup> | 16.4 $\pm$ 0.7 <sup>Bb</sup>  |
|                                     |                 | 4 <sup>th</sup> | 16.3 $\pm$ 0.7 <sup>Ab</sup>  | 14.5 $\pm$ 0.6 <sup>Bc</sup>  | 14.8 $\pm$ 0.6 <sup>Bb</sup>  |
|                                     | 2 <sup>nd</sup> | 1 <sup>st</sup> | 21.9 $\pm$ 0.9 <sup>Ba</sup>  | 21.1 $\pm$ 0.9 <sup>Ba</sup>  | 24.9 $\pm$ 1.1 <sup>Aa</sup>  |
|                                     |                 | 2 <sup>nd</sup> | 20.8 $\pm$ 0.9 <sup>Aab</sup> | 19.4 $\pm$ 0.8 <sup>Aab</sup> | 21.8 $\pm$ 0.9 <sup>Ab</sup>  |
|                                     |                 | 3 <sup>rd</sup> | 19.5 $\pm$ 0.8 <sup>Ab</sup>  | 17.8 $\pm$ 0.8 <sup>Abc</sup> | 19.5 $\pm$ 0.8 <sup>Ac</sup>  |
|                                     |                 | 4 <sup>th</sup> | 17.6 $\pm$ 0.8 <sup>Ac</sup>  | 15.9 $\pm$ 0.7 <sup>ABc</sup> | 17.8 $\pm$ 0.8 <sup>Ad</sup>  |
|                                     | 3 <sup>rd</sup> | 1 <sup>st</sup> | 26.0 $\pm$ 1.1 <sup>Aa</sup>  | 24.0 $\pm$ 1.0 <sup>Aa</sup>  | 26.8 $\pm$ 1.2 <sup>Aa</sup>  |
|                                     |                 | 2 <sup>nd</sup> | 23.8 $\pm$ 1.0 <sup>ABb</sup> | 23.2 $\pm$ 1.0 <sup>Ba</sup>  | 24.5 $\pm$ 1.1 <sup>Aa</sup>  |
|                                     |                 | 3 <sup>rd</sup> | 22.3 $\pm$ 1.0 <sup>Ab</sup>  | 21.0 $\pm$ 0.9 <sup>Bb</sup>  | 22.9 $\pm$ 1.0 <sup>ABb</sup> |
|                                     |                 | 4 <sup>th</sup> | 20.7 $\pm$ 0.9 <sup>Ac</sup>  | 18.9 $\pm$ 0.8 <sup>Bb</sup>  | 21.4 $\pm$ 0.9 <sup>Ab</sup>  |
| SDI <sub>10</sub> +N <sub>240</sub> | 1 <sup>st</sup> | 1 <sup>st</sup> | 19.7 $\pm$ 0.8 <sup>Aa</sup>  | 19.1 $\pm$ 0.8 <sup>Aa</sup>  | 18.6 $\pm$ 0.8 <sup>Aa</sup>  |
|                                     |                 | 2 <sup>nd</sup> | 18.8 $\pm$ 0.8 <sup>Aab</sup> | 18.1 $\pm$ 0.8 <sup>Aa</sup>  | 17.3 $\pm$ 0.7 <sup>Aa</sup>  |
|                                     |                 | 3 <sup>rd</sup> | 17.4 $\pm$ 0.7 <sup>Aab</sup> | 16.2 $\pm$ 0.7 <sup>Ab</sup>  | 16.0 $\pm$ 0.7 <sup>Aa</sup>  |
|                                     |                 | 4 <sup>th</sup> | 16.4 $\pm$ 0.7 <sup>Ab</sup>  | 14.2 $\pm$ 0.6 <sup>Bc</sup>  | 14.5 $\pm$ 0.6 <sup>Bb</sup>  |
|                                     | 2 <sup>nd</sup> | 1 <sup>st</sup> | 21.5 $\pm$ 0.9 <sup>Ba</sup>  | 20.6 $\pm$ 0.9 <sup>Ba</sup>  | 24.1 $\pm$ 1.0 <sup>Aa</sup>  |
|                                     |                 | 2 <sup>nd</sup> | 20.5 $\pm$ 0.9 <sup>Aa</sup>  | 18.9 $\pm$ 0.8 <sup>Bb</sup>  | 21.6 $\pm$ 0.9 <sup>Aa</sup>  |
|                                     |                 | 3 <sup>rd</sup> | 19.0 $\pm$ 0.8 <sup>Ab</sup>  | 17.4 $\pm$ 0.7 <sup>Ab</sup>  | 19.0 $\pm$ 0.8 <sup>Ab</sup>  |
|                                     |                 | 4 <sup>th</sup> | 17.2 $\pm$ 0.7 <sup>ABb</sup> | 15.6 $\pm$ 0.7 <sup>Bc</sup>  | 17.4 $\pm$ 0.7 <sup>Ab</sup>  |
|                                     | 3 <sup>rd</sup> | 1 <sup>st</sup> | 24.9 $\pm$ 1.1 <sup>ABa</sup> | 22.7 $\pm$ 1.0 <sup>Ba</sup>  | 26.0 $\pm$ 1.1 <sup>Aa</sup>  |
|                                     |                 | 2 <sup>nd</sup> | 23.0 $\pm$ 1.0 <sup>Aab</sup> | 22.2 $\pm$ 0.9 <sup>Aa</sup>  | 24.0 $\pm$ 1.0 <sup>Aa</sup>  |
|                                     |                 | 3 <sup>rd</sup> | 21.3 $\pm$ 0.9 <sup>Aab</sup> | 20.6 $\pm$ 0.9 <sup>Aab</sup> | 22.1 $\pm$ 0.9 <sup>Ab</sup>  |
|                                     |                 | 4 <sup>th</sup> | 19.6 $\pm$ 0.8 <sup>Ab</sup>  | 18.4 $\pm$ 0.8 <sup>Ab</sup>  | 22.2 $\pm$ 0.9 <sup>Ab</sup>  |

Means of different uppercase letters (rows) indicate a significant difference at ( $p < 0.05$ ) according to LSD test of soil moisture among three horizontal distances (0.07, 0.14, and 0.20 m), while lowercase (columns) indicates a significant difference of soil moisture in four sampling times within each irrigation events (1<sup>st</sup>, 2<sup>nd</sup>, 3<sup>rd</sup>, and 4<sup>th</sup>) within each irrigation event. SDI<sub>10</sub>+N<sub>300</sub> and SDI<sub>10</sub>+N<sub>240</sub> are not significantly different.

**Table S3** Soil average  $\pm$  standard deviation of WFPS% for SDI<sub>15</sub> treatments.

| Treatment                           | Irrigation      | Sampling        | Horizontal distance (m)  |                         |                         |     |      |     |  |      |        |       |        |        |          |
|-------------------------------------|-----------------|-----------------|--------------------------|-------------------------|-------------------------|-----|------|-----|--|------|--------|-------|--------|--------|----------|
|                                     |                 |                 | 0.07                     | 0.14                    | 0.20                    |     |      |     |  |      |        |       |        |        |          |
| SDI <sub>15</sub> +N <sub>300</sub> | 1 <sup>st</sup> | 1 <sup>st</sup> | 19.6±0.8 <sup>Aa</sup>   | 19.5±0.8 <sup>Aa</sup>  | 18.6±0.8 <sup>Aa</sup>  |     |      |     |  |      |        |       |        |        |          |
|                                     |                 | 2 <sup>nd</sup> | 18.8±0.8 <sup>Aa</sup>   | 18.1±0.8 <sup>ABa</sup> | 17.5±0.8 <sup>Bab</sup> |     |      |     |  |      |        |       |        |        |          |
|                                     |                 | 3 <sup>rd</sup> | 17.6±0.8 <sup>Aa</sup>   | 16.5±0.7 <sup>Ab</sup>  | 16.4±0.7 <sup>Ab</sup>  |     |      |     |  |      |        |       |        |        |          |
|                                     |                 | 4 <sup>th</sup> | 16.7±0.7 <sup>Aa</sup>   | 14.7±0.6 <sup>Bc</sup>  | 15.0±0.7 <sup>ABb</sup> |     |      |     |  |      |        |       |        |        |          |
|                                     | 2 <sup>nd</sup> | 1 <sup>st</sup> | 21.1±0.9 <sup>ABa</sup>  | 20.4±0.9 <sup>Ba</sup>  | 23.5±1.0 <sup>Aa</sup>  |     |      |     |  |      |        |       |        |        |          |
|                                     |                 | 2 <sup>nd</sup> | 20.3±0.9 <sup>ABa</sup>  | 18.9±0.8 <sup>Bab</sup> | 21.3±0.9 <sup>Ab</sup>  |     |      |     |  |      |        |       |        |        |          |
|                                     |                 | 3 <sup>rd</sup> | 18.9±0.8 <sup>Ab</sup>   | 17.5±0.8 <sup>Ab</sup>  | 19.0±0.8 <sup>Abc</sup> |     |      |     |  |      |        |       |        |        |          |
|                                     |                 | 4 <sup>th</sup> | 17.3±0.7 <sup>Ab</sup>   | 15.9±0.7 <sup>Bc</sup>  | 17.5±0.8 <sup>Ac</sup>  |     |      |     |  |      |        |       |        |        |          |
|                                     | 3 <sup>rd</sup> | 1 <sup>st</sup> | 23.7±1.0 <sup>ABa</sup>  | 22.3±1.0 <sup>Ba</sup>  | 25.1±1.1 <sup>Aa</sup>  |     |      |     |  |      |        |       |        |        |          |
|                                     |                 | 2 <sup>nd</sup> | 22.5±1.0 <sup>Aab</sup>  | 21.8±0.9 <sup>Aa</sup>  | 23.4±1.0 <sup>Aab</sup> |     |      |     |  |      |        |       |        |        |          |
|                                     |                 | 3 <sup>rd</sup> | 20.9±0.9 <sup>Ab</sup>   | 20.3±0.9 <sup>Aa</sup>  | 21.7±0.9 <sup>Ab</sup>  |     |      |     |  |      |        |       |        |        |          |
|                                     |                 | 4 <sup>th</sup> | 19.4±0.8 <sup>Ab</sup>   | 18.4±0.8 <sup>Ab</sup>  | 20.0±0.9 <sup>Ab</sup>  |     |      |     |  |      |        |       |        |        |          |
| SDI <sub>15</sub> +N <sub>240</sub> | 1 <sup>st</sup> | 1 <sup>st</sup> | 19.3±0.8 <sup>Aa</sup>   | 19.1±0.8 <sup>Aa</sup>  | 18.3±0.8 <sup>Aa</sup>  |     |      |     |  |      |        |       |        |        |          |
|                                     |                 | 2 <sup>nd</sup> | 18.5±0.8 <sup>Aa</sup>   | 17.9±0.8 <sup>Aab</sup> | 17.3±0.7 <sup>Aa</sup>  |     |      |     |  |      |        |       |        |        |          |
|                                     |                 | 3 <sup>rd</sup> | 17.4±0.7 <sup>Aab</sup>  | 16.5±0.7 <sup>Abc</sup> | 16.3±0.7 <sup>Ab</sup>  |     |      |     |  |      |        |       |        |        |          |
|                                     |                 | 4 <sup>th</sup> | 16.6±0.7 <sup>Ab</sup>   | 14.8±0.6 <sup>Cc</sup>  | 15.1±0.6 <sup>Bb</sup>  |     |      |     |  |      |        |       |        |        |          |
|                                     | 2 <sup>nd</sup> | 1 <sup>st</sup> | 20.6±0.9 <sup>ABa</sup>  | 19.9±0.8 <sup>Ba</sup>  | 22.7±1.0 <sup>Aa</sup>  |     |      |     |  |      |        |       |        |        |          |
|                                     |                 | 2 <sup>nd</sup> | 19.8±0.8 <sup>ABab</sup> | 18.6±0.8 <sup>Bab</sup> | 20.7±0.9 <sup>Ab</sup>  |     |      |     |  |      |        |       |        |        |          |
|                                     |                 | 3 <sup>rd</sup> | 18.6±0.8 <sup>Ab</sup>   | 17.4±0.7 <sup>Ab</sup>  | 18.7±0.8 <sup>Ac</sup>  |     |      |     |  |      |        |       |        |        |          |
|                                     |                 | 4 <sup>th</sup> | 17.2±0.7 <sup>Ab</sup>   | 15.9±0.7 <sup>Bc</sup>  | 17.3±0.7 <sup>Ac</sup>  |     |      |     |  |      |        |       |        |        |          |
|                                     | 3 <sup>rd</sup> | 1 <sup>st</sup> | 23.0±1.0 <sup>Aa</sup>   | 21.6±0.9 <sup>Ba</sup>  | 24.2±1.0 <sup>Aa</sup>  |     |      |     |  |      |        |       |        |        |          |
|                                     |                 | 2 <sup>nd</sup> | 21.8±0.9 <sup>Aab</sup>  | 21.2±0.9 <sup>Aa</sup>  | 22.7±1.0 <sup>Ab</sup>  |     |      |     |  |      |        |       |        |        |          |
|                                     |                 | 3 <sup>rd</sup> | 20.4±0.9 <sup>ABbc</sup> | 19.9±0.8 <sup>Bb</sup>  | 21.1±0.9 <sup>Ab</sup>  |     |      |     |  |      |        |       |        |        |          |
|                                     |                 | 4 <sup>th</sup> | 19.1±0.8 <sup>ABc</sup>  | 18.2±0.8 <sup>Bc</sup>  | 19.6±0.8 <sup>Ac</sup>  |     |      |     |  |      |        |       |        |        |          |
| ANOVA                               |                 |                 |                          |                         |                         |     |      |     |  |      |        |       |        |        |          |
| I                                   | N               | HD              | S                        | I*N                     | I*HD                    | I*S | N*HD | N*S |  | HD*S | I*N*HD | I*N*S | I*HD*S | N*HD*S | I*N*HD*S |
| *                                   | ns              | *               | *                        | ns                      | ns                      | ns  | ns   | ns  |  | *    | ns     | ns    | ns     | ns     | ns       |

Means of different uppercase letters (rows) indicate a significant difference at ( $p < 0.05$ ) according to LSD test of soil soil moisture among three horizontal distances (0.07, 0.14, and 0.20 m), while lowercase (columns) indicates a significant difference of soil soil moisture in four sampling times within each irrigation events (1<sup>st</sup>, 2<sup>nd</sup>, 3<sup>rd</sup>, and 4<sup>th</sup>) within each irrigation event. SDI<sub>15</sub>+N<sub>300</sub> and SDI<sub>15</sub>+N<sub>240</sub> are not significantly different. I, N, HD, and S represent irrigation, nitrogen, horizontal distance, and sampling time, respectively. ns means not significant and \*denotes significant differences at  $P < 0.05$ . The ANOVA includes Tables S1-S3 as combined.



**Table S4** Soil average  $\pm$  standard deviation of  $\text{NH}_4^+\text{-N}$   $\text{mg kg}^{-1}$  under SD1<sub>5</sub> treatments.

| Treatment                           | Irrigation      | Sampling        | Horizontal distance (m)     |                             |                             |
|-------------------------------------|-----------------|-----------------|-----------------------------|-----------------------------|-----------------------------|
|                                     |                 |                 | 0.07                        | 0.14                        | 0.20                        |
| SDI <sub>5</sub> + N <sub>300</sub> | 1 <sup>st</sup> | 1 <sup>st</sup> | 23 $\pm$ 1.0 <sup>Ba</sup>  | 19 $\pm$ 0.8 <sup>Ba</sup>  | 39 $\pm$ 1.7 <sup>Aa</sup>  |
|                                     |                 | 2 <sup>nd</sup> | 18 $\pm$ 0.8 <sup>Aab</sup> | 14 $\pm$ 0.6 <sup>Aa</sup>  | 24 $\pm$ 1.0 <sup>Ab</sup>  |
|                                     |                 | 3 <sup>rd</sup> | 13 $\pm$ 0.6 <sup>Aab</sup> | 9 $\pm$ 0.4 <sup>Bb</sup>   | 18 $\pm$ 0.1 <sup>Ac</sup>  |
|                                     |                 | 4 <sup>th</sup> | 7 $\pm$ 0.3 <sup>Ab</sup>   | 5 $\pm$ 0.2 <sup>Ab</sup>   | 8 $\pm$ 0.4 <sup>Ad</sup>   |
|                                     | 2 <sup>nd</sup> | 1 <sup>st</sup> | 15 $\pm$ 0.7 <sup>Aa</sup>  | 12 $\pm$ 0.5 <sup>Aa</sup>  | 18 $\pm$ 0.8 <sup>Aa</sup>  |
|                                     |                 | 2 <sup>nd</sup> | 9 $\pm$ 0.4 <sup>Aa</sup>   | 11 $\pm$ 0.5 <sup>Aab</sup> | 10 $\pm$ 0.4 <sup>Aab</sup> |
|                                     |                 | 3 <sup>rd</sup> | 5 $\pm$ 0.2 <sup>Aa</sup>   | 7 $\pm$ 0.3 <sup>Ab</sup>   | 7 $\pm$ 0.3 <sup>Ab</sup>   |
|                                     |                 | 4 <sup>th</sup> | 2 $\pm$ 0.1 <sup>Aa</sup>   | 5 $\pm$ 0.2 <sup>Ab</sup>   | 3 $\pm$ 0.1 <sup>Ab</sup>   |
|                                     | 3 <sup>rd</sup> | 1 <sup>st</sup> | 11 $\pm$ 0.5 <sup>Ba</sup>  | 6 $\pm$ 0.2 <sup>Aa</sup>   | 13 $\pm$ 0.6 <sup>Aa</sup>  |
|                                     |                 | 2 <sup>nd</sup> | 6 $\pm$ 0.3 <sup>Aa</sup>   | 4 $\pm$ 0.2 <sup>Aa</sup>   | 6 $\pm$ 0.3 <sup>Aab</sup>  |
|                                     |                 | 3 <sup>rd</sup> | 4 $\pm$ 0.2 <sup>Aa</sup>   | 3 $\pm$ 0.1 <sup>Aa</sup>   | 3 $\pm$ 0.2 <sup>Aab</sup>  |
|                                     |                 | 4 <sup>th</sup> | 2 $\pm$ 0.1 <sup>Aa</sup>   | 2 $\pm$ 0.1 <sup>Aa</sup>   | 3 $\pm$ 0.1 <sup>Ab</sup>   |
| SDI <sub>5</sub> + N <sub>240</sub> | 1 <sup>st</sup> | 1 <sup>st</sup> | 19 $\pm$ 0.8 <sup>Ba</sup>  | 16 $\pm$ 0.7 <sup>Ba</sup>  | 31 $\pm$ 1.4 <sup>Aa</sup>  |
|                                     |                 | 2 <sup>nd</sup> | 15 $\pm$ 0.6 <sup>Aa</sup>  | 12 $\pm$ 0.5 <sup>Aab</sup> | 19 $\pm$ 0.8 <sup>Ab</sup>  |
|                                     |                 | 3 <sup>rd</sup> | 11 $\pm$ 0.5 <sup>Aa</sup>  | 8 $\pm$ 0.3 <sup>Bbc</sup>  | 14 $\pm$ 0.6 <sup>Abc</sup> |
|                                     |                 | 4 <sup>th</sup> | 6 $\pm$ 0.3 <sup>Ab</sup>   | 4 $\pm$ 0.2 <sup>Ac</sup>   | 6 $\pm$ 0.3 <sup>Ac</sup>   |
|                                     | 2 <sup>nd</sup> | 1 <sup>st</sup> | 13 $\pm$ 0.5 <sup>Aa</sup>  | 10 $\pm$ 0.4 <sup>Aa</sup>  | 15 $\pm$ 0.6 <sup>Aa</sup>  |
|                                     |                 | 2 <sup>nd</sup> | 7 $\pm$ 0.3 <sup>Ab</sup>   | 9 $\pm$ 0.4 <sup>Aa</sup>   | 9 $\pm$ 0.4 <sup>Aab</sup>  |
|                                     |                 | 3 <sup>rd</sup> | 5 $\pm$ 0.2 <sup>Ab</sup>   | 6 $\pm$ 0.3 <sup>Aa</sup>   | 6 $\pm$ 0.3 <sup>Abc</sup>  |
|                                     |                 | 4 <sup>th</sup> | 2 $\pm$ 0.1 <sup>Ab</sup>   | 4 $\pm$ 0.2 <sup>Aa</sup>   | 3 $\pm$ 0.1 <sup>Ac</sup>   |
|                                     | 3 <sup>rd</sup> | 1 <sup>st</sup> | 10 $\pm$ 0.4 <sup>Aa</sup>  | 5 $\pm$ 0.2 <sup>Ba</sup>   | 11 $\pm$ 0.5 <sup>Aa</sup>  |
|                                     |                 | 2 <sup>nd</sup> | 6 $\pm$ 0.2 <sup>Aab</sup>  | 4 $\pm$ 0.2 <sup>Aa</sup>   | 5 $\pm$ 0.2 <sup>Aa</sup>   |
|                                     |                 | 3 <sup>rd</sup> | 3 $\pm$ 0.1 <sup>Aab</sup>  | 3 $\pm$ 0.1 <sup>Aa</sup>   | 3 $\pm$ 0.1 <sup>Aa</sup>   |
|                                     |                 | 4 <sup>th</sup> | 2 $\pm$ 0.1 <sup>Ab</sup>   | 2 $\pm$ 0.1 <sup>Aa</sup>   | 2 $\pm$ 0.1 <sup>Aa</sup>   |

Means of different uppercase letters (rows) indicate a significant difference at ( $p < 0.05$ ) according to the LSD test of soil  $\text{NH}_4^+\text{-N}$  among three horizontal distances (0.07, 0.14, and 0.20 m), while lowercase (columns) indicates a significant difference in  $\text{NH}_4^+\text{-N}$  in four sampling times within each irrigation event (1<sup>st</sup>, 2<sup>nd</sup>, 3<sup>rd</sup>, and 4<sup>th</sup>) within each irrigation event. SDI<sub>5</sub>+N<sub>300</sub> and SDI<sub>5</sub>+N<sub>240</sub> are not significantly different.

**Table S5** Soil average  $\pm$  standard deviation of  $\text{NH}_4^+\text{-N}$   $\text{mg kg}^{-1}$  under  $\text{SDI}_{10}$  treatments.

| Treatment                        | Irrigation      | Sampling        | Horizontal distance (m)     |                             |                             |
|----------------------------------|-----------------|-----------------|-----------------------------|-----------------------------|-----------------------------|
|                                  |                 |                 | 0.07                        | 0.14                        | 0.20                        |
| $\text{SDI}_{10}+\text{N}_{300}$ | 1 <sup>st</sup> | 1 <sup>st</sup> | 30 $\pm$ 1.3 <sup>Ba</sup>  | 24 $\pm$ 1.0 <sup>Ba</sup>  | 54 $\pm$ 2.3 <sup>Aa</sup>  |
|                                  |                 | 2 <sup>nd</sup> | 23 $\pm$ 1.0 <sup>ABb</sup> | 19 $\pm$ 0.8 <sup>Bb</sup>  | 36 $\pm$ 1.5 <sup>Ab</sup>  |
|                                  |                 | 3 <sup>rd</sup> | 17 $\pm$ 0.7 <sup>ABb</sup> | 14 $\pm$ 0.6 <sup>Bb</sup>  | 23 $\pm$ 1.0 <sup>Ac</sup>  |
|                                  |                 | 4 <sup>th</sup> | 12 $\pm$ 0.5 <sup>Ab</sup>  | 11 $\pm$ 0.5 <sup>Ab</sup>  | 11 $\pm$ 0.5 <sup>Ac</sup>  |
|                                  | 2 <sup>nd</sup> | 1 <sup>st</sup> | 24 $\pm$ 1.0 <sup>Aa</sup>  | 22 $\pm$ 0.9 <sup>Aa</sup>  | 29 $\pm$ 1.2 <sup>Aa</sup>  |
|                                  |                 | 2 <sup>nd</sup> | 19 $\pm$ 0.8 <sup>Ab</sup>  | 17 $\pm$ 0.7 <sup>Aa</sup>  | 22 $\pm$ 1.0 <sup>Ab</sup>  |
|                                  |                 | 3 <sup>rd</sup> | 14 $\pm$ 0.6 <sup>ABb</sup> | 12 $\pm$ 0.5 <sup>Bab</sup> | 16 $\pm$ 0.7 <sup>Ab</sup>  |
|                                  |                 | 4 <sup>th</sup> | 10 $\pm$ 0.4 <sup>Ab</sup>  | 8 $\pm$ 0.4 <sup>Ab</sup>   | 11 $\pm$ 0.5 <sup>Ac</sup>  |
|                                  | 3 <sup>rd</sup> | 1 <sup>st</sup> | 19 $\pm$ 0.8 <sup>Aba</sup> | 17 $\pm$ 0.7 <sup>Ba</sup>  | 26 $\pm$ 1.1 <sup>Aa</sup>  |
|                                  |                 | 2 <sup>nd</sup> | 16 $\pm$ 0.7 <sup>Aba</sup> | 14 $\pm$ 0.6 <sup>Bab</sup> | 20 $\pm$ 0.9 <sup>Aa</sup>  |
|                                  |                 | 3 <sup>rd</sup> | 12 $\pm$ 0.5 <sup>Aab</sup> | 11 $\pm$ 0.5 <sup>Ab</sup>  | 16 $\pm$ 0.7 <sup>Aab</sup> |
|                                  |                 | 4 <sup>th</sup> | 9 $\pm$ 0.4 <sup>Ab</sup>   | 8 $\pm$ 0.3 <sup>Ab</sup>   | 12 $\pm$ 0.5 <sup>Ab</sup>  |
| $\text{SDI}_{10}+\text{N}_{240}$ | 1 <sup>st</sup> | 1 <sup>st</sup> | 25 $\pm$ 1.1 <sup>Ba</sup>  | 20 $\pm$ 0.9 <sup>Ba</sup>  | 45 $\pm$ 1.9 <sup>Aa</sup>  |
|                                  |                 | 2 <sup>nd</sup> | 19 $\pm$ 0.8 <sup>Ba</sup>  | 16 $\pm$ 0.7 <sup>Cab</sup> | 30 $\pm$ 1.3 <sup>Aa</sup>  |
|                                  |                 | 3 <sup>rd</sup> | 14 $\pm$ 0.6 <sup>Ab</sup>  | 12 $\pm$ 0.5 <sup>Abc</sup> | 19 $\pm$ 0.8 <sup>Ab</sup>  |
|                                  |                 | 4 <sup>th</sup> | 10 $\pm$ 0.4 <sup>Ab</sup>  | 9 $\pm$ 0.4 <sup>Ac</sup>   | 9 $\pm$ 0.4 <sup>Ab</sup>   |
|                                  | 2 <sup>nd</sup> | 1 <sup>st</sup> | 20 $\pm$ 0.9 <sup>Aa</sup>  | 18 $\pm$ 0.8 <sup>Aa</sup>  | 24 $\pm$ 1.0 <sup>Aa</sup>  |
|                                  |                 | 2 <sup>nd</sup> | 16 $\pm$ 0.7 <sup>Ba</sup>  | 14 $\pm$ 0.6 <sup>Bab</sup> | 19 $\pm$ 0.8 <sup>Aab</sup> |
|                                  |                 | 3 <sup>rd</sup> | 11 $\pm$ 0.5 <sup>Aab</sup> | 10 $\pm$ 0.4 <sup>Ab</sup>  | 13 $\pm$ 0.6 <sup>Aab</sup> |
|                                  |                 | 4 <sup>th</sup> | 9 $\pm$ 0.4 <sup>Ab</sup>   | 7 $\pm$ 0.3 <sup>Ab</sup>   | 9 $\pm$ 0.4 <sup>Ab</sup>   |
|                                  | 3 <sup>rd</sup> | 1 <sup>st</sup> | 16 $\pm$ 0.7 <sup>Ba</sup>  | 14 $\pm$ 0.6 <sup>Ba</sup>  | 22 $\pm$ 0.9 <sup>Aa</sup>  |
|                                  |                 | 2 <sup>nd</sup> | 14 $\pm$ 0.6 <sup>Aa</sup>  | 12 $\pm$ 0.5 <sup>Aa</sup>  | 17 $\pm$ 0.7 <sup>Aa</sup>  |
|                                  |                 | 3 <sup>rd</sup> | 10 $\pm$ 0.4 <sup>Aa</sup>  | 9 $\pm$ 0.4 <sup>Aa</sup>   | 13 $\pm$ 0.6 <sup>Aa</sup>  |
|                                  |                 | 4 <sup>th</sup> | 7 $\pm$ 0.3 <sup>Aa</sup>   | 6 $\pm$ 0.3 <sup>Aa</sup>   | 10 $\pm$ 0.4 <sup>Aa</sup>  |

Means of different uppercase letters (rows) indicate a significant difference at ( $p < 0.05$ ) according to the LSD test of soil  $\text{NH}_4^+\text{-N}$  among three horizontal distances (0.07, 0.14, and 0.20 m), while lowercase (columns) indicates a significant difference in soil  $\text{NH}_4^+\text{-N}$  in four sampling times within each irrigation event (1<sup>st</sup>, 2<sup>nd</sup>, 3<sup>rd</sup>, and 4<sup>th</sup>) within each irrigation event.  $\text{SDI}_{10}+\text{N}_{300}$  and  $\text{SDI}_{10}+\text{N}_{240}$  are not significantly different.

**Table S6** Soil average  $\pm$  standard deviation of  $\text{NH}_4^+\text{-N}$   $\text{mg kg}^{-1}$  under  $\text{SDI}_{15}$  treatments.

| Treatment                           | Irrigation | Sampling | Horizontal distance (m) |           |           |     |      |     |      |        |       |        |        |          |
|-------------------------------------|------------|----------|-------------------------|-----------|-----------|-----|------|-----|------|--------|-------|--------|--------|----------|
|                                     |            |          | 0.07                    | 0.14      | 0.20      |     |      |     |      |        |       |        |        |          |
| SDI <sub>15</sub> +N <sub>300</sub> | 1st        | 1st      | 40±1.7Ba                | 34±1.5Ba  | 62±2.7Aa  |     |      |     |      |        |       |        |        |          |
|                                     |            | 2nd      | 31±1.3Ba                | 26±1.1Ba  | 44±1.9Ab  |     |      |     |      |        |       |        |        |          |
|                                     |            | 3rd      | 20±0.9Ab                | 18±0.8Ab  | 28±1.2Ac  |     |      |     |      |        |       |        |        |          |
|                                     |            | 4th      | 12±0.5Bc                | 12±0.5Bb  | 17±0.7Ac  |     |      |     |      |        |       |        |        |          |
|                                     | 2nd        | 1st      | 32±1.4Aa                | 29±1.2Aa  | 41±1.8Aa  |     |      |     |      |        |       |        |        |          |
|                                     |            | 2nd      | 27±1.2Bb                | 23±1.0Bb  | 32±1.4Aa  |     |      |     |      |        |       |        |        |          |
|                                     |            | 3rd      | 18±0.8Abc               | 16±0.7Ac  | 22±0.9Ab  |     |      |     |      |        |       |        |        |          |
|                                     |            | 4th      | 12±0.5Ac                | 11±0.5Ac  | 15±0.6Ac  |     |      |     |      |        |       |        |        |          |
|                                     | 3rd        | 1st      | 27±1.2Aa                | 24±1.0Aa  | 30±1.3Aa  |     |      |     |      |        |       |        |        |          |
|                                     |            | 2nd      | 22±1.0Aa                | 19±0.8Bb  | 25±1.1Aab |     |      |     |      |        |       |        |        |          |
|                                     |            | 3rd      | 16±0.7Bb                | 14±0.6Bbc | 19±0.8Ab  |     |      |     |      |        |       |        |        |          |
|                                     |            | 4th      | 11±0.5Ab                | 10±0.4Ab  | 14±0.6Ab  |     |      |     |      |        |       |        |        |          |
| SDI <sub>15</sub> +N <sub>240</sub> | 1st        | 1st      | 34±1.5Ba                | 29±1.3Ba  | 52±2.2Aa  |     |      |     |      |        |       |        |        |          |
|                                     |            | 2nd      | 27±1.2Bb                | 23±1.0Bab | 37±1.6Ab  |     |      |     |      |        |       |        |        |          |
|                                     |            | 3rd      | 18±0.8Bb                | 16±0.7Bb  | 25±1.1Ac  |     |      |     |      |        |       |        |        |          |
|                                     |            | 4th      | 12±0.5Ab                | 12±0.5Ab  | 16±0.7Ac  |     |      |     |      |        |       |        |        |          |
|                                     | 2nd        | 1st      | 28±1.2Ba                | 25±1.1Ba  | 35±1.5Aa  |     |      |     |      |        |       |        |        |          |
|                                     |            | 2nd      | 24±1.0Aab               | 21±0.9Aa  | 27±1.2Ab  |     |      |     |      |        |       |        |        |          |
|                                     |            | 3rd      | 17±0.7Ab                | 15±0.7Ab  | 19±0.8Ab  |     |      |     |      |        |       |        |        |          |
|                                     |            | 4th      | 12±0.5Ac                | 11±0.5Ab  | 14±0.6Ac  |     |      |     |      |        |       |        |        |          |
|                                     | 3rd        | 1st      | 24±1.0Aa                | 21±0.9Aa  | 26±1.1Aa  |     |      |     |      |        |       |        |        |          |
|                                     |            | 2nd      | 20±0.9Aab               | 18±0.8Aa  | 22±0.9Aab |     |      |     |      |        |       |        |        |          |
|                                     |            | 3rd      | 15±0.7Abc               | 14±0.6Ab  | 17±0.7Aab |     |      |     |      |        |       |        |        |          |
|                                     |            | 4th      | 11±0.5Ac                | 10±0.4Ab  | 13±0.6Ab  |     |      |     |      |        |       |        |        |          |
| ANOVA                               |            |          |                         |           |           |     |      |     |      |        |       |        |        |          |
| I                                   | N          | HD       | S                       | I*N       | I*HD      | I*S | N*HD | N*S | HD*S | I*N*HD | I*N*S | I*HD*S | N*HD*S | I*N*HD*S |
| *                                   | *          | *        | *                       | ns        | ns        | ns  | ns   | ns  | ns   | ns     | ns    | ns     | ns     | ns       |

Means of different uppercase letters (rows) indicate a significant difference at ( $p < 0.05$ ) according to LSD test of soil  $\text{NH}_4^+\text{-N}$  among three horizontal distances (0.07, 0.14, and 0.20 m), while lowercase (columns) indicates a significant difference of soil  $\text{NH}_4^+\text{-N}$  in four sampling times within each irrigation events (1<sup>st</sup>, 2<sup>nd</sup>, 3<sup>rd</sup>, and 4<sup>th</sup>) within each irrigation event.  $\text{SDI}_{15}+\text{N}_{300}$  and  $\text{SDI}_{15}+\text{N}_{240}$  are not significantly different. I, N, HD, and S represent irrigation, nitrogen, horizontal distance, and sampling time, respectively. Ns means not significant and \*denotes significant differences at  $P < 0.05$ . The ANOVA includes Tables S4-S6 as combined.

**Table S7** Soil average  $\pm$  standard deviation of  $\text{NO}_3^-$ -N  $\text{mg kg}^{-1}$  under SD15 treatments.

| Treatment                          | Irrigation      | Sampling        | Horizontal distance (m)      |                              |                              |
|------------------------------------|-----------------|-----------------|------------------------------|------------------------------|------------------------------|
|                                    |                 |                 | 0.07                         | 0.14                         | 0.20                         |
| SDI <sub>5</sub> +N <sub>300</sub> | 1 <sup>st</sup> | 1 <sup>st</sup> | 57 $\pm$ 2.5 <sup>Bad</sup>  | 64 $\pm$ 2.8 <sup>Ad</sup>   | 48 $\pm$ 2.1 <sup>Cd</sup>   |
|                                    |                 | 2 <sup>nd</sup> | 109 $\pm$ 4.7 <sup>Bc</sup>  | 125 $\pm$ 5.4 <sup>Ac</sup>  | 93 $\pm$ 4.0 <sup>Cc</sup>   |
|                                    |                 | 3 <sup>rd</sup> | 206 $\pm$ 8.9 <sup>Ab</sup>  | 212 $\pm$ 9.2 <sup>Ab</sup>  | 128 $\pm$ 5.5 <sup>Bb</sup>  |
|                                    |                 | 4 <sup>th</sup> | 245 $\pm$ 10.6 <sup>Aa</sup> | 258 $\pm$ 11.2 <sup>Aa</sup> | 154 $\pm$ 6.7 <sup>Ba</sup>  |
|                                    | 2 <sup>nd</sup> | 1 <sup>st</sup> | 77 $\pm$ 3.3 <sup>Bd</sup>   | 92 $\pm$ 4.0 <sup>Ad</sup>   | 71 $\pm$ 3.1 <sup>Bd</sup>   |
|                                    |                 | 2 <sup>nd</sup> | 178 $\pm$ 7.7 <sup>Ac</sup>  | 184 $\pm$ 8.0 <sup>Ac</sup>  | 116 $\pm$ 5.0 <sup>Bc</sup>  |
|                                    |                 | 3 <sup>rd</sup> | 208 $\pm$ 9.0 <sup>Bb</sup>  | 244 $\pm$ 10.5 <sup>Ab</sup> | 158 $\pm$ 6.8 <sup>Cb</sup>  |
|                                    |                 | 4 <sup>th</sup> | 264 $\pm$ 11.4 <sup>Ba</sup> | 297 $\pm$ 12.8 <sup>Aa</sup> | 210 $\pm$ 9.1 <sup>Ca</sup>  |
|                                    | 3 <sup>rd</sup> | 1 <sup>st</sup> | 83 $\pm$ 3.6 <sup>Bd</sup>   | 155 $\pm$ 6.7 <sup>Ad</sup>  | 93 $\pm$ 4.0 <sup>Bd</sup>   |
|                                    |                 | 2 <sup>nd</sup> | 193 $\pm$ 8.3 <sup>Bc</sup>  | 301 $\pm$ 13.0 <sup>Ac</sup> | 188 $\pm$ 8.1 <sup>Bc</sup>  |
|                                    |                 | 3 <sup>rd</sup> | 372 $\pm$ 16.1 <sup>Bb</sup> | 429 $\pm$ 18.5 <sup>Ab</sup> | 274 $\pm$ 11.9 <sup>Cb</sup> |
|                                    |                 | 4 <sup>th</sup> | 485 $\pm$ 21.0 <sup>Ba</sup> | 522 $\pm$ 22.6 <sup>Aa</sup> | 373 $\pm$ 16.1 <sup>Ca</sup> |
| SDI <sub>5</sub> +N <sub>240</sub> | 1 <sup>st</sup> | 1 <sup>st</sup> | 40 $\pm$ 1.7 <sup>ABb</sup>  | 50 $\pm$ 2.2 <sup>Ad</sup>   | 34 $\pm$ 1.5 <sup>Bc</sup>   |
|                                    |                 | 2 <sup>nd</sup> | 95 $\pm$ 4.1 <sup>ABab</sup> | 107 $\pm$ 4.6 <sup>Ac</sup>  | 94 $\pm$ 4.1 <sup>Bb</sup>   |
|                                    |                 | 3 <sup>rd</sup> | 183 $\pm$ 7.9 <sup>Aa</sup>  | 202 $\pm$ 8.7 <sup>Ab</sup>  | 123 $\pm$ 5.3 <sup>Ba</sup>  |
|                                    |                 | 4 <sup>th</sup> | 152 $\pm$ 9.6 <sup>Ba</sup>  | 241 $\pm$ 10.4 <sup>Aa</sup> | 142 $\pm$ 6.1 <sup>Ba</sup>  |
|                                    | 2 <sup>nd</sup> | 1 <sup>st</sup> | 62 $\pm$ 2.7 <sup>Bd</sup>   | 80 $\pm$ 3.4 <sup>Ad</sup>   | 57 $\pm$ 2.5 <sup>Cd</sup>   |
|                                    |                 | 2 <sup>nd</sup> | 148 $\pm$ 6.4 <sup>Bc</sup>  | 163 $\pm$ 7.0 <sup>Ac</sup>  | 107 $\pm$ 4.6 <sup>Cc</sup>  |
|                                    |                 | 3 <sup>rd</sup> | 176 $\pm$ 7.6 <sup>Bb</sup>  | 222 $\pm$ 9.6 <sup>Ab</sup>  | 156 $\pm$ 6.8 <sup>Cb</sup>  |
|                                    |                 | 4 <sup>th</sup> | 240 $\pm$ 10.4 <sup>Ba</sup> | 278 $\pm$ 12.0 <sup>Aa</sup> | 202 $\pm$ 8.7 <sup>Ca</sup>  |
|                                    | 3 <sup>rd</sup> | 1 <sup>st</sup> | 81 $\pm$ 3.5 <sup>Bd</sup>   | 131 $\pm$ 5.7 <sup>Ad</sup>  | 71 $\pm$ 3.1 <sup>Bd</sup>   |
|                                    |                 | 2 <sup>nd</sup> | 181 $\pm$ 7.8 <sup>Bc</sup>  | 231 $\pm$ 10.0 <sup>Ac</sup> | 156 $\pm$ 6.8 <sup>Cc</sup>  |
|                                    |                 | 3 <sup>rd</sup> | 297 $\pm$ 12.8 <sup>Bb</sup> | 353 $\pm$ 15.3 <sup>Ab</sup> | 224 $\pm$ 9.7 <sup>Cb</sup>  |
|                                    |                 | 4 <sup>th</sup> | 403 $\pm$ 17.4 <sup>Ba</sup> | 468 $\pm$ 20.2 <sup>Aa</sup> | 291 $\pm$ 12.6 <sup>Ca</sup> |

Means of different uppercase letters (rows) indicate a significant difference at ( $p < 0.05$ ) according to the LSD test of soil  $\text{NO}_3^-$ -N among three horizontal distances (0.7, 0.14, and 0.20 m), while lowercase (columns) indicates a significant difference in soil  $\text{NO}_3^-$ -N in four sampling times within each irrigation event (1<sup>st</sup>, 2<sup>nd</sup>, 3<sup>rd</sup>, and 4<sup>th</sup>) within each irrigation event. SDI<sub>5</sub>+N<sub>300</sub> and SDI<sub>5</sub>+N<sub>240</sub> are not significantly different.

**Table S8** Soil average  $\pm$  standard deviation of  $\text{NO}_3^-$ -N  $\text{mg kg}^{-1}$  under  $\text{SDI}_{10}$  treatments.

| Treatment                        | Irrigation      | Sampling        | Horizontal distance (m)       |                              |                              |
|----------------------------------|-----------------|-----------------|-------------------------------|------------------------------|------------------------------|
|                                  |                 |                 | 0.07                          | 0.14                         | 0.20                         |
| $\text{SDI}_{10}+\text{N}_{300}$ | 1 <sup>st</sup> | 1 <sup>st</sup> | 48 $\pm$ 2.1 <sup>Bd</sup>    | 60 $\pm$ 2.6 <sup>Ad</sup>   | 45 $\pm$ 1.9 <sup>Bb</sup>   |
|                                  |                 | 2 <sup>nd</sup> | 97 $\pm$ 4.2 <sup>Bc</sup>    | 107 $\pm$ 4.6 <sup>Ac</sup>  | 86 $\pm$ 3.7 <sup>Bab</sup>  |
|                                  |                 | 3 <sup>rd</sup> | 169 $\pm$ 7.3 <sup>Bb</sup>   | 204 $\pm$ 8.8 <sup>Ab</sup>  | 103 $\pm$ 4.5 <sup>Cb</sup>  |
|                                  |                 | 4 <sup>th</sup> | 222 $\pm$ 9.6 <sup>Aa</sup>   | 232 $\pm$ 10.0 <sup>Aa</sup> | 130 $\pm$ 5.6 <sup>Ba</sup>  |
|                                  | 2 <sup>nd</sup> | 1 <sup>st</sup> | 56 $\pm$ 2.4 <sup>Cd</sup>    | 81 $\pm$ 3.5 <sup>Ac</sup>   | 68 $\pm$ 2.9 <sup>Bd</sup>   |
|                                  |                 | 2 <sup>nd</sup> | 125 $\pm$ 5.4 <sup>Bc</sup>   | 169 $\pm$ 7.3 <sup>Ab</sup>  | 102 $\pm$ 4.4 <sup>Cc</sup>  |
|                                  |                 | 3 <sup>rd</sup> | 178 $\pm$ 7.7 <sup>Bb</sup>   | 238 $\pm$ 10.3 <sup>Aa</sup> | 140 $\pm$ 6.0 <sup>Cb</sup>  |
|                                  |                 | 4 <sup>th</sup> | 233 $\pm$ 10.1 <sup>Ba</sup>  | 272 $\pm$ 11.8 <sup>Aa</sup> | 198 $\pm$ 8.5 <sup>Ca</sup>  |
|                                  | 3 <sup>rd</sup> | 1 <sup>st</sup> | 76 $\pm$ 3.3 <sup>Cd</sup>    | 124 $\pm$ 5.4 <sup>Ad</sup>  | 90 $\pm$ 3.9 <sup>Bd</sup>   |
|                                  |                 | 2 <sup>nd</sup> | 165 $\pm$ 7.1 <sup>Bc</sup>   | 293 $\pm$ 12.7 <sup>Ac</sup> | 174 $\pm$ 7.5 <sup>Bc</sup>  |
|                                  |                 | 3 <sup>rd</sup> | 315 $\pm$ 13.6 <sup>Bb</sup>  | 387 $\pm$ 16.7 <sup>Ab</sup> | 251 $\pm$ 10.9 <sup>Cb</sup> |
|                                  |                 | 4 <sup>th</sup> | 460 $\pm$ 19.9 <sup>Ba</sup>  | 509 $\pm$ 22.0 <sup>Aa</sup> | 301 $\pm$ 13.0 <sup>Ca</sup> |
| $\text{SDI}_{10}+\text{N}_{240}$ | 1 <sup>st</sup> | 1 <sup>st</sup> | 38 $\pm$ 1.6 <sup>Ad</sup>    | 45 $\pm$ 1.9 <sup>Ad</sup>   | 28 $\pm$ 1.9 <sup>Bd</sup>   |
|                                  |                 | 2 <sup>nd</sup> | 87 $\pm$ 3.8 <sup>Ac</sup>    | 99 $\pm$ 4.3 <sup>Ac</sup>   | 67 $\pm$ 2.9 <sup>Bc</sup>   |
|                                  |                 | 3 <sup>rd</sup> | 151 $\pm$ 6.5 <sup>Bb</sup>   | 174 $\pm$ 7.5 <sup>Ab</sup>  | 91 $\pm$ 3.9 <sup>Cb</sup>   |
|                                  |                 | 4 <sup>th</sup> | 196 $\pm$ 8.4 <sup>Ba</sup>   | 220 $\pm$ 9.5 <sup>Aa</sup>  | 122 $\pm$ 5.3 <sup>Ca</sup>  |
|                                  | 2 <sup>nd</sup> | 1 <sup>st</sup> | 50 $\pm$ 2.2 <sup>Bc</sup>    | 71 $\pm$ 3.1 <sup>Ad</sup>   | 52 $\pm$ 2.2 <sup>Bd</sup>   |
|                                  |                 | 2 <sup>nd</sup> | 118 $\pm$ 5.1 <sup>Bb</sup>   | 141 $\pm$ 6.1 <sup>Ac</sup>  | 85 $\pm$ 3.7 <sup>Cc</sup>   |
|                                  |                 | 3 <sup>rd</sup> | 159 $\pm$ 6.9 <sup>Bb</sup>   | 183 $\pm$ 7.9 <sup>Ab</sup>  | 130 $\pm$ 5.6 <sup>Cb</sup>  |
|                                  |                 | 4 <sup>th</sup> | 206 $\pm$ 8.9 <sup>Aa</sup>   | 250 $\pm$ 10.8 <sup>Aa</sup> | 149 $\pm$ 6.5 <sup>Ba</sup>  |
|                                  | 3 <sup>rd</sup> | 1 <sup>st</sup> | 62 $\pm$ 2.7 <sup>Bd</sup>    | 103 $\pm$ 4.4 <sup>Ad</sup>  | 64 $\pm$ 2.8 <sup>Bb</sup>   |
|                                  |                 | 2 <sup>nd</sup> | 153 $\pm$ 6.6 <sup>Bc</sup>   | 197 $\pm$ 8.5 <sup>Ac</sup>  | 132 $\pm$ 5.7 <sup>Cb</sup>  |
|                                  |                 | 3 <sup>rd</sup> | 274 $\pm$ 11.9 <sup>ABb</sup> | 313 $\pm$ 13.5 <sup>Ab</sup> | 151 $\pm$ 9.3 <sup>Bb</sup>  |
|                                  |                 | 4 <sup>th</sup> | 379 $\pm$ 16.4 <sup>Ba</sup>  | 431 $\pm$ 18.6 <sup>Aa</sup> | 276 $\pm$ 11.9 <sup>Ca</sup> |

Means of different uppercase letters (rows) indicate a significant difference at ( $p < 0.05$ ) according to the LSD test of soil  $\text{NO}_3^-$ -N among three horizontal distances (0.07, 0.14, and 0.20 m), while lowercase (columns) indicates a significant difference in soil  $\text{NO}_3^-$ -N in four sampling times within each irrigation event (1<sup>st</sup>, 2<sup>nd</sup>, 3<sup>rd</sup>, and 4<sup>th</sup>) within each irrigation event.  $\text{SDI}_{10}+\text{N}_{300}$  and  $\text{SDI}_{10}+\text{N}_{240}$  are not significantly different.

**Table S9** Soil average  $\pm$  standard deviation of  $\text{NO}_3^-$ -N  $\text{mg kg}^{-1}$  under SD1<sub>15</sub> treatments.

| Treatment                           | Irrigation      | Sampling        | Horizontal distance (m)      |                              |                              |
|-------------------------------------|-----------------|-----------------|------------------------------|------------------------------|------------------------------|
|                                     |                 |                 | 0.07                         | 0.14                         | 0.20                         |
| SDI <sub>15</sub> +N <sub>300</sub> | 1 <sup>st</sup> | 1 <sup>st</sup> | 40 $\pm$ 1.7 <sup>ABd</sup>  | 53 $\pm$ 2.3 <sup>Ad</sup>   | 39 $\pm$ 1.7 <sup>Bd</sup>   |
|                                     |                 | 2 <sup>nd</sup> | 91 $\pm$ 3.9 <sup>Ac</sup>   | 98 $\pm$ 4.2 <sup>Ac</sup>   | 76 $\pm$ 3.3 <sup>Ac</sup>   |
|                                     |                 | 3 <sup>rd</sup> | 145 $\pm$ 6.3 <sup>Bb</sup>  | 180 $\pm$ 7.8 <sup>Ab</sup>  | 99 $\pm$ 4.3 <sup>Cb</sup>   |
|                                     |                 | 4 <sup>th</sup> | 198 $\pm$ 8.5 <sup>Ba</sup>  | 208 $\pm$ 9.0 <sup>Aa</sup>  | 115 $\pm$ 5.0 <sup>Ca</sup>  |
|                                     | 2 <sup>nd</sup> | 1 <sup>st</sup> | 45 $\pm$ 1.9 <sup>Bb</sup>   | 69 $\pm$ 3.0 <sup>Ad</sup>   | 56 $\pm$ 2.4 <sup>Bd</sup>   |
|                                     |                 | 2 <sup>nd</sup> | 80 $\pm$ 4.9 <sup>Bb</sup>   | 134 $\pm$ 5.8 <sup>Ac</sup>  | 96 $\pm$ 4.1 <sup>Bc</sup>   |
|                                     |                 | 3 <sup>rd</sup> | 172 $\pm$ 7.4 <sup>Aa</sup>  | 201 $\pm$ 8.9 <sup>Ab</sup>  | 128 $\pm$ 5.5 <sup>Ab</sup>  |
|                                     |                 | 4 <sup>th</sup> | 181 $\pm$ 7.8 <sup>Ba</sup>  | 238 $\pm$ 10.3 <sup>Aa</sup> | 183 $\pm$ 7.9 <sup>Ba</sup>  |
|                                     | 3 <sup>rd</sup> | 1 <sup>st</sup> | 64 $\pm$ 2.8 <sup>Bd</sup>   | 108 $\pm$ 4.7 <sup>Ad</sup>  | 78 $\pm$ 3.4 <sup>Bd</sup>   |
|                                     |                 | 2 <sup>nd</sup> | 157 $\pm$ 6.8 <sup>Bc</sup>  | 259 $\pm$ 11.2 <sup>Ac</sup> | 147 $\pm$ 6.4 <sup>Cc</sup>  |
|                                     |                 | 3 <sup>rd</sup> | 235 $\pm$ 10.2 <sup>Bb</sup> | 333 $\pm$ 14.4 <sup>Ab</sup> | 215 $\pm$ 9.3 <sup>Cb</sup>  |
|                                     |                 | 4 <sup>th</sup> | 401 $\pm$ 17.3 <sup>Ba</sup> | 464 $\pm$ 20.0 <sup>Aa</sup> | 258 $\pm$ 11.2 <sup>Ca</sup> |
| SDI <sub>15</sub> +N <sub>240</sub> | 1 <sup>st</sup> | 1 <sup>st</sup> | 36 $\pm$ 1.5 <sup>Ad</sup>   | 42 $\pm$ 1.8 <sup>Ad</sup>   | 24 $\pm$ 1.1 <sup>Bd</sup>   |
|                                     |                 | 2 <sup>nd</sup> | 85 $\pm$ 3.7 <sup>Bc</sup>   | 97 $\pm$ 4.2 <sup>Ac</sup>   | 62 $\pm$ 2.7 <sup>Cc</sup>   |
|                                     |                 | 3 <sup>rd</sup> | 139 $\pm$ 6.0 <sup>Ab</sup>  | 154 $\pm$ 6.7 <sup>Ab</sup>  | 74 $\pm$ 3.2 <sup>Bb</sup>   |
|                                     |                 | 4 <sup>th</sup> | 182 $\pm$ 7.8 <sup>Ba</sup>  | 194 $\pm$ 8.4 <sup>Aa</sup>  | 91 $\pm$ 3.9 <sup>Ca</sup>   |
|                                     | 2 <sup>nd</sup> | 1 <sup>st</sup> | 41 $\pm$ 1.8 <sup>Bd</sup>   | 65 $\pm$ 2.8 <sup>Ac</sup>   | 44 $\pm$ 1.9 <sup>Bd</sup>   |
|                                     |                 | 2 <sup>nd</sup> | 103 $\pm$ 4.4 <sup>Bc</sup>  | 140 $\pm$ 6.0 <sup>Ab</sup>  | 69 $\pm$ 3.0 <sup>Cc</sup>   |
|                                     |                 | 3 <sup>rd</sup> | 146 $\pm$ 6.3 <sup>Bb</sup>  | 199 $\pm$ 8.6 <sup>Aa</sup>  | 113 $\pm$ 4.9 <sup>Cb</sup>  |
|                                     |                 | 4 <sup>th</sup> | 173 $\pm$ 7.5 <sup>Ba</sup>  | 211 $\pm$ 9.1 <sup>Aa</sup>  | 131 $\pm$ 5.7 <sup>Ca</sup>  |
|                                     | 3 <sup>rd</sup> | 1 <sup>st</sup> | 51 $\pm$ 2.2 <sup>Bd</sup>   | 84 $\pm$ 3.6 <sup>Ad</sup>   | 54 $\pm$ 2.3 <sup>Bd</sup>   |
|                                     |                 | 2 <sup>nd</sup> | 142 $\pm$ 6.1 <sup>Bc</sup>  | 186 $\pm$ 8.0 <sup>Ac</sup>  | 115 $\pm$ 5.0 <sup>Cc</sup>  |
|                                     |                 | 3 <sup>rd</sup> | 229 $\pm$ 9.9 <sup>Bb</sup>  | 297 $\pm$ 12.8 <sup>Ab</sup> | 198 $\pm$ 8.6 <sup>Cb</sup>  |
|                                     |                 | 4 <sup>th</sup> | 339 $\pm$ 14.7 <sup>Ba</sup> | 415 $\pm$ 17.9 <sup>Aa</sup> | 247 $\pm$ 10.7 <sup>Ca</sup> |

## ANOVA

| I | N  | HD | S | I*N | I*HD | I*S | N*HD | N*S | HD*S | I*N*HD | I*N*S | I*HD*S | N*HD*S | I*N*HD*S |
|---|----|----|---|-----|------|-----|------|-----|------|--------|-------|--------|--------|----------|
| * | ns | *  | * | ns  | ns   | ns  | ns   | ns  | ns   | ns     | ns    | ns     | ns     | ns       |

Notes: means of different uppercase letters (rows) indicate a significant difference at ( $p < 0.05$ ) according to LSD test of soil  $\text{NO}_3^-$ -N among three horizontal distances (0.07, 0.14, and 0.20 m), while lowercase (columns) indicates a significant difference in soil  $\text{NO}_3^-$ -N in four sampling times within each irrigation event (1<sup>st</sup>, 2<sup>nd</sup>, 3<sup>rd</sup>, and 4<sup>th</sup>) within each irrigation event. SDI<sub>15</sub>+N<sub>300</sub> and SDI<sub>15</sub>+N<sub>240</sub> are not significantly different. I, N, HD, and S represent irrigation, nitrogen, horizontal distance, and Sampling time, respectively. Ns means not significant and \*denotes significant differences at  $P \leq 0.05$ . The ANOVA includes Tables S7-S9 combined.

**Table S10** Correlations ( $R^2$ ) between  $N_2O$  emissions and soil moisture at different depths under  $SDI_{10}$ .

| Treatment          | Horizontal distance m) | Depths (cm) | Point1        | Point2        | Point3        | Point4        | Point5        |
|--------------------|------------------------|-------------|---------------|---------------|---------------|---------------|---------------|
| $SDI_{10}+N_{300}$ | 0.07 m                 | 5           | 0.0062        | 0.0042        | 0.0132        | 0.0116        | 0.0130        |
|                    |                        | 10          | 0.1300        | 0.1112        | 0.1522        | 0.1430        | 0.1488        |
|                    |                        | 15          | <b>0.1775</b> | <b>0.1313</b> | <b>0.1996</b> | <b>0.1748</b> | <b>0.1778</b> |
|                    |                        | 20          | 0.0106        | 0.0027        | 0.0220        | 0.0215        | 0.0195        |
|                    |                        | 25          | 0.0003        | 0.0029        | 0.0002        | 0.0007        | 0.0002        |
|                    | 0.14 m                 | 5           | <b>0.1891</b> | <b>0.1576</b> | <b>0.2061</b> | <b>0.1974</b> | <b>0.1914</b> |
|                    |                        | 10          | 0.1294        | 0.0941        | 0.1463        | 0.1296        | 0.1358        |
|                    |                        | 15          | 0.0937        | 0.0604        | 0.1044        | 0.0845        | 0.0913        |
|                    |                        | 20          | 0.0176        | 0.0046        | 0.0164        | 0.0092        | 0.0092        |
|                    |                        | 25          | 0.0006        | 0.0032        | 0.0000        | 0.0001        | 0.0001        |
|                    | 0.20 m                 | 5           | 0.0530        | 0.0398        | 0.0719        | 0.0730        | 0.0719        |
|                    |                        | 10          | <b>0.0962</b> | <b>0.0725</b> | <b>0.1142</b> | <b>0.1103</b> | <b>0.1013</b> |
|                    |                        | 15          | 0.0144        | 0.0079        | 0.0237        | 0.0256        | 0.0217        |
|                    |                        | 20          | 0.0055        | 0.0015        | 0.0102        | 0.0121        | 0.0097        |
|                    |                        | 25          | 0.0140        | 0.0117        | 0.0198        | 0.0285        | 0.0216        |
| $SDI_{10}+N_{240}$ | 0.07 m                 | 5           | 0.0036        | 0.0001        | 0.0079        | 0.0121        | 0.0174        |
|                    |                        | 10          | 0.0966        | 0.0767        | 0.1187        | 0.1444        | 0.1704        |
|                    |                        | 15          | <b>0.1186</b> | <b>0.1181</b> | <b>0.1318</b> | <b>0.1673</b> | <b>0.1978</b> |
|                    |                        | 20          | 0.0025        | 0.0016        | 0.0052        | 0.0141        | 0.0186        |
|                    |                        | 25          | 0.0079        | 0.0112        | 0.0023        | 0.0002        | 0.0003        |
|                    | 0.14 m                 | 5           | <b>0.1502</b> | <b>0.1304</b> | <b>0.1697</b> | <b>0.1879</b> | <b>0.2128</b> |
|                    |                        | 10          | 0.0903        | 0.0698        | 0.1073        | 0.1275        | 0.1515        |
|                    |                        | 15          | 0.0542        | 0.0455        | 0.0670        | 0.0831        | 0.1101        |
|                    |                        | 20          | 0.0008        | 0.0003        | 0.0041        | 0.0060        | 0.0174        |
|                    |                        | 25          | 0.0079        | 0.0134        | 0.0020        | 0.0007        | 0.0002        |
|                    | 0.20 m                 | 5           | 0.0380        | 0.0193        | 0.0555        | 0.0665        | 0.0752        |
|                    |                        | 10          | <b>0.0642</b> | <b>0.0430</b> | <b>0.0851</b> | <b>0.0993</b> | <b>0.1128</b> |
|                    |                        | 15          | 0.0044        | 0.0001        | 0.0135        | 0.0188        | 0.0251        |
|                    |                        | 20          | 0.0000        | 0.0010        | 0.0022        | 0.0053        | 0.0112        |
|                    |                        | 25          | 0.0046        | 0.0000        | 0.0172        | 0.0176        | 0.0232        |

**Note:** values in bold are the maximum correlation among five depths in each point.

**Table S11** Correlations ( $R^2$ ) between  $N_2O$  emissions and soil moisture at different depths under SDI<sub>15</sub>.

| Treatment                           | Horizontal distance (m) | Depths (cm) | Point1        | Point2        | Point3        | Point4        | Point5        |
|-------------------------------------|-------------------------|-------------|---------------|---------------|---------------|---------------|---------------|
| SDI <sub>15</sub> +N <sub>300</sub> | 0.07 m                  | 5           | 0.0260        | 0.0217        | 0.0217        | 0.0257        | 0.0139        |
|                                     |                         | 10          | 0.0074        | 0.0119        | 0.0204        | 0.0093        | 0.0142        |
|                                     |                         | 15          | 0.1191        | 0.1352        | 0.1498        | 0.0990        | 0.1297        |
|                                     |                         | 20          | <b>0.1279</b> | <b>0.1561</b> | <b>0.1691</b> | <b>0.1501</b> | <b>0.1481</b> |
|                                     |                         | 25          | 0.0022        | 0.0081        | 0.0127        | 0.0117        | 0.0087        |
|                                     | 0.14 m                  | 5           | 0.0059        | 0.0031        | 0.0006        | 0.0023        | 0.0006        |
|                                     |                         | 10          | <b>0.1422</b> | <b>0.1528</b> | <b>0.1731</b> | <b>0.1373</b> | <b>0.1624</b> |
|                                     |                         | 15          | 0.0991        | 0.1159        | 0.1234        | 0.0881        | 0.1071        |
|                                     |                         | 20          | 0.0613        | 0.0751        | 0.0866        | 0.0728        | 0.0786        |
|                                     |                         | 25          | 0.0019        | 0.0051        | 0.0067        | 0.0052        | 0.0070        |
|                                     | 0.20 m                  | 5           | 0.0109        | 0.0160        | 0.0175        | 0.0040        | 0.0187        |
|                                     |                         | 10          | 0.0475        | 0.0601        | 0.0661        | 0.0422        | 0.0612        |
|                                     |                         | 15          | <b>0.0761</b> | <b>0.0951</b> | <b>0.0968</b> | <b>0.0666</b> | <b>0.0913</b> |
|                                     |                         | 20          | 0.0084        | 0.0151        | 0.0173        | 0.0062        | 0.0163        |
|                                     |                         | 25          | 0.0006        | 0.0035        | 0.0057        | 0.0012        | 0.0041        |
| SDI <sub>15</sub> +N <sub>240</sub> | 0.07 m                  | 5           | 0.0082        | 0.0138        | 0.0044        | 0.1730        | 0.0153        |
|                                     |                         | 10          | 0.0262        | 0.0139        | 0.0676        | 0.0190        | 0.0377        |
|                                     |                         | 15          | 0.1607        | 0.1336        | 0.2358        | 0.1556        | 0.1939        |
|                                     |                         | 20          | <b>0.2174</b> | <b>0.1789</b> | <b>0.3244</b> | <b>0.1844</b> | <b>0.2257</b> |
|                                     |                         | 25          | 0.0302        | 0.0148        | 0.0707        | 0.0137        | 0.0299        |
|                                     | 0.14 m                  | 5           | 0.0003        | 0.0005        | 0.0073        | 0.0005        | 0.0002        |
|                                     |                         | 10          | <b>0.2028</b> | <b>0.1726</b> | <b>0.2930</b> | <b>0.1812</b> | <b>0.2137</b> |
|                                     |                         | 15          | 0.1496        | 0.1186        | 0.2314        | 0.1341        | 0.1688        |
|                                     |                         | 20          | 0.1182        | 0.0909        | 0.1955        | 0.0962        | 0.1223        |
|                                     |                         | 25          | 0.0236        | 0.0132        | 0.0556        | 0.0116        | 0.0178        |
|                                     | 0.20 m                  | 5           | 0.0265        | 0.0165        | 0.0355        | 0.0184        | 0.0286        |
|                                     |                         | 10          | 0.0819        | 0.0611        | 0.1224        | 0.0692        | 0.0922        |
|                                     |                         | 15          | <b>0.1294</b> | <b>0.1038</b> | <b>0.1936</b> | <b>0.1107</b> | <b>0.1352</b> |
|                                     |                         | 20          | 0.0305        | 0.0182        | 0.0578        | 0.0212        | 0.0337        |
|                                     |                         | 25          | 0.0162        | 0.0063        | 0.0361        | 0.0062        | 0.0167        |

**Note:** values in bold are the maximum correlation among five depths in each point.



**Table S12** Correlations ( $R^2$ ) between  $N_2O$  emissions and soil  $NH_4^+-N$  at different depths under  $SDI_5$ .

| Treatment       | Horizontal distance (m) | Depths (cm) | Point1         | Point2         | Point3         | Point4         | Point5         |
|-----------------|-------------------------|-------------|----------------|----------------|----------------|----------------|----------------|
| $SDI_5+N_{300}$ | 0.07 m                  | 5           | <b>0.4249*</b> | <b>0.4112*</b> | <b>0.3753*</b> | <b>0.4122*</b> | <b>0.4120*</b> |
|                 |                         | 10          | 0.3113         | 0.3249         | 0.2863         | 0.2833         | 0.3137         |
|                 |                         | 15          | 0.3254         | 0.3520*        | 0.2931         | 0.3148         | 0.3220         |
|                 |                         | 20          | 0.3709*        | 0.4054*        | 0.3392*        | 0.3673*        | 0.3605*        |
|                 |                         | 25          | 0.3588*        | 0.3840*        | 0.3333*        | 0.3610*        | 0.3557*        |
|                 | 0.14 m                  | 5           | <b>0.3534*</b> | 0.3727*        | 0.3564*        | 0.3292         | 0.3357*        |
|                 |                         | 10          | 0.2914         | 0.3162         | 0.2944         | 0.2737         | 0.2796         |
|                 |                         | 15          | 0.1534         | 0.1675         | 0.1594         | 0.1288         | 0.1334         |
|                 |                         | 20          | 0.1365         | 0.1412         | 0.1568         | 0.1125         | 0.1221         |
|                 |                         | 25          | 0.3531*        | <b>0.4188*</b> | <b>0.4023*</b> | <b>0.3567*</b> | <b>0.3714*</b> |
|                 | 0.20 m                  | 5           | <b>0.2783</b>  | <b>0.3055</b>  | <b>0.2507</b>  | <b>0.2630</b>  | <b>0.2682</b>  |
|                 |                         | 10          | 0.2626         | 0.2951         | 0.2402         | 0.2532         | 0.2550         |
|                 |                         | 15          | 0.1776         | 0.1956         | 0.1551         | 0.1649         | 0.1623         |
|                 |                         | 20          | 0.2040         | 0.2221         | 0.1829         | 0.1915         | 0.1854         |
|                 |                         | 25          | 0.2562         | 0.2942         | 0.2387         | 0.2575         | 0.2469         |
| $SDI_5+N_{240}$ | 0.07 m                  | 5           | <b>0.4219*</b> | <b>0.3748*</b> | <b>0.4660*</b> | <b>0.3967*</b> | <b>0.4277*</b> |
|                 |                         | 10          | 0.3223         | 0.3120         | 0.3485*        | 0.3104         | 0.3367*        |
|                 |                         | 15          | 0.3110         | 0.2907         | 0.3628*        | 0.3290         | 0.3333*        |
|                 |                         | 20          | 0.3369*        | 0.3162         | 0.4066*        | 0.3643*        | 0.3611*        |
|                 |                         | 25          | 0.3415*        | 0.3041         | 0.3922*        | 0.3784*        | 0.3599*        |
|                 | 0.14 m                  | 5           | <b>0.3389*</b> | 0.3364*        | 0.3912*        | 0.3375*        | 0.3616*        |
|                 |                         | 10          | 0.2781         | 0.2729         | 0.3302         | 0.2882         | 0.3037         |
|                 |                         | 15          | 0.1262         | 0.1329         | 0.1726         | 0.1149         | 0.1423         |
|                 |                         | 20          | 0.1242         | 0.1292         | 0.1586         | 0.1057         | 0.1401         |
|                 |                         | 25          | 0.3282         | <b>0.3681*</b> | <b>0.4065*</b> | <b>0.3513*</b> | <b>0.3887*</b> |
|                 | 0.20 m                  | 5           | <b>0.2656</b>  | <b>0.2557</b>  | <b>0.3181</b>  | 0.2691         | <b>0.2819</b>  |
|                 |                         | 10          | 0.2511         | 0.2386         | 0.3068         | <b>0.2715</b>  | 0.2750         |
|                 |                         | 15          | 0.1616         | 0.1447         | 0.2073         | 0.1705         | 0.1745         |
|                 |                         | 20          | 0.1826         | 0.1629         | 0.2344         | 0.1907         | 0.1946         |
|                 |                         | 25          | 0.2263         | 0.2118         | 0.2928         | 0.2618         | 0.2538         |

**Note:** \* denotes the significant correlation between  $N_2O$  emissions and soil  $NH_4^+-N$  at different depths. Point1, point2, point3, point4, and point5 represent chamber NO 1, 2, 3, 4, and 5, respectively.

**Table S13** Correlations ( $R^2$ ) between  $N_2O$  emissions and soil  $NH_4^+-N$  at different depths under  $SDI_{10}$ .

| Treatment          | Horizontal distance (m) | Depths (cm) | Point1         | Point2         | Point3         | Point4         | Point5         |
|--------------------|-------------------------|-------------|----------------|----------------|----------------|----------------|----------------|
| $SDI_{10}+N_{300}$ | 0.07 m                  | 5           | 0.3292         | 0.2813         | 0.3168         | 0.2529         | 0.2859         |
|                    |                         | 10          | 0.3757*        | 0.3456*        | 0.3602*        | 0.2994         | 0.3323*        |
|                    |                         | 15          | 0.3826*        | 0.3479*        | 0.3637*        | 0.2978         | 0.3371*        |
|                    |                         | 20          | <b>0.4145*</b> | <b>0.3802*</b> | <b>0.3877*</b> | <b>0.3191</b>  | <b>0.3573*</b> |
|                    |                         | 25          | 0.3439*        | 0.2994         | 0.3241         | 0.2552         | 0.2922         |
|                    | 0.14 m                  | 5           | 0.3433*        | 0.2819         | 0.3204         | 0.2506         | 0.2892         |
|                    |                         | 10          | 0.3102         | 0.2941         | 0.2898         | 0.2345         | 0.2702         |
|                    |                         | 15          | <b>0.4614*</b> | <b>0.4378*</b> | 0.4317*        | 0.3660*        | 0.4047*        |
|                    |                         | 20          | 0.3888*        | 0.3451*        | 0.3917*        | 0.3589*        | 0.3572*        |
|                    |                         | 25          | 0.4229*        | 0.3897*        | <b>0.4503*</b> | <b>0.4199*</b> | <b>0.4147*</b> |
|                    | 0.20 m                  | 5           | <b>0.6040*</b> | <b>0.5817*</b> | <b>0.5987*</b> | <b>0.5260*</b> | <b>0.5773*</b> |
|                    |                         | 10          | 0.1011         | 0.0803         | 0.0788         | 0.0426         | 0.0652         |
|                    |                         | 15          | 0.1090         | 0.0794         | 0.0905         | 0.0518         | 0.0780         |
|                    |                         | 20          | 0.4525*        | 0.4119*        | 0.4433*        | 0.3764*        | 0.4156*        |
|                    |                         | 25          | 0.4152*        | 0.3753*        | 0.3933*        | 0.3196         | 0.3633*        |
| $SDI_{10}+N_{240}$ | 0.07 m                  | 5           | 0.3067         | 0.2815         | 0.2960         | 0.3010         | 0.3248         |
|                    |                         | 10          | 0.3778*        | 0.3379*        | 0.3702*        | 0.3613*        | 0.3829*        |
|                    |                         | 15          | 0.3827*        | 0.3431*        | 0.3751*        | 0.3624*        | 0.3878*        |
|                    |                         | 20          | <b>0.3975*</b> | <b>0.3797*</b> | <b>0.3869*</b> | <b>0.3809*</b> | <b>0.4139*</b> |
|                    |                         | 25          | 0.3391*        | 0.3213         | 0.3144         | 0.3141         | 0.3362*        |
|                    | 0.14 m                  | 5           | 0.3076         | 0.2889         | 0.2942         | 0.2984         | 0.3292         |
|                    |                         | 10          | 0.3192         | 0.2933         | 0.3079         | 0.2954         | 0.3209         |
|                    |                         | 15          | <b>0.4588*</b> | <b>0.4299*</b> | 0.4520*        | 0.4333*        | <b>0.4640*</b> |
|                    |                         | 20          | 0.3922*        | 0.3101         | 0.3979*        | 0.3872*        | 0.3734*        |
|                    |                         | 25          | 0.4571*        | 0.3636*        | <b>0.4608*</b> | <b>0.4587*</b> | 0.4255*        |
|                    | 0.20 m                  | 5           | <b>0.6070*</b> | <b>0.6258*</b> | <b>0.5827*</b> | <b>0.5966*</b> | <b>0.6280*</b> |
|                    |                         | 10          | 0.0829         | 0.0911         | 0.0714         | 0.0700         | 0.0959         |
|                    |                         | 15          | 0.0758         | 0.0749         | 0.0748         | 0.0769         | 0.1130         |
|                    |                         | 20          | 0.4400*        | 0.4281*        | 0.4230*        | 0.4327*        | 0.4681*        |
|                    |                         | 25          | 0.4024*        | 0.3966*        | 0.3826*        | 0.3807*        | 0.4186*        |

**Note:** \* denotes the significant correlation between  $N_2O$  emissions and soil  $NH_4^+-N$  at different depths. Point1, point2, point3, point4, and point5 represent chamber NO 1, 2, 3, 4, and 5, respectively.

**Table S14** Correlations ( $R^2$ ) between  $N_2O$  emissions and soil  $NH_4^+-N$  at different depths under  $SDI_{15}$ .

| Treatment          | Horizontal distance (m) | Depths (cm) | Point1         | Point2         | Point3         | Point4         | Point5         |
|--------------------|-------------------------|-------------|----------------|----------------|----------------|----------------|----------------|
| $SDI_{15}+N_{300}$ | 0.07 m                  | 5           | <b>0.5138*</b> | <b>0.5035*</b> | <b>0.4992*</b> | <b>0.4475*</b> | <b>0.4886*</b> |
|                    |                         | 10          | 0.2342         | 0.2294         | 0.2263         | 0.1879         | 0.2138         |
|                    |                         | 15          | 0.3585*        | 0.3283         | 0.3454*        | 0.3121         | 0.3584*        |
|                    |                         | 20          | 0.4898*        | 0.4499*        | 0.4688*        | 0.4412*        | 0.4944*        |
|                    |                         | 25          | 0.3158         | 0.3185         | 0.2781         | 0.2352         | 0.2414         |
|                    | 0.14 m                  | 5           | <b>0.6388*</b> | <b>0.6274*</b> | <b>0.6290*</b> | <b>0.5840*</b> | <b>0.6258*</b> |
|                    |                         | 10          | 0.2276         | 0.2206         | 0.2273         | 0.1868         | 0.2224         |
|                    |                         | 15          | 0.3362*        | 0.3091         | 0.3168         | 0.2815         | 0.3279         |
|                    |                         | 20          | 0.4280*        | 0.3972*        | 0.3887*        | 0.3498*        | 0.3958*        |
|                    |                         | 25          | 0.2051         | 0.1880         | 0.1872         | 0.1680         | 0.1830         |
|                    | 0.20 m                  | 5           | 0.2977         | 0.2683         | 0.2674         | 0.2522         | 0.2639         |
|                    |                         | 10          | 0.2714         | 0.2627         | 0.2595         | 0.2284         | 0.2471         |
|                    |                         | 15          | 0.3342*        | 0.3029         | 0.3117         | 0.2861         | 0.3137         |
|                    |                         | 20          | 0.3724*        | 0.3418*        | 0.3453*        | 0.3054         | 0.3516*        |
|                    |                         | 25          | <b>0.4022*</b> | <b>0.3924*</b> | <b>0.3934*</b> | <b>0.3417*</b> | <b>0.3767*</b> |
| $SDI_{15}+N_{240}$ | 0.07 m                  | 5           | <b>0.5138*</b> | <b>0.5035*</b> | <b>0.4992*</b> | <b>0.4475*</b> | 0.4886*        |
|                    |                         | 10          | 0.2342         | 0.2294         | 0.2263         | 0.1879         | 0.2138         |
|                    |                         | 15          | 0.3585*        | 0.3283         | 0.3454*        | 0.3121         | 0.3584*        |
|                    |                         | 20          | 0.4898*        | 0.4499*        | 0.4688*        | 0.4412*        | <b>0.4944*</b> |
|                    |                         | 25          | 0.3158         | 0.3185         | 0.2781         | 0.2352         | 0.2414         |
|                    | 0.14 m                  | 5           | <b>0.6388*</b> | <b>0.6274*</b> | <b>0.6290*</b> | <b>0.5840*</b> | <b>0.6258*</b> |
|                    |                         | 10          | 0.2276         | 0.2206         | 0.2273         | 0.1868         | 0.2224         |
|                    |                         | 15          | 0.3362*        | 0.3091         | 0.3168         | 0.2815         | 0.3279         |
|                    |                         | 20          | 0.4280*        | 0.3972*        | 0.3887*        | 0.3498*        | 0.3958*        |
|                    |                         | 25          | 0.2051         | 0.1880         | 0.1872         | 0.1680         | 0.1830         |
|                    | 0.20 m                  | 5           | 0.2977         | 0.2683         | 0.2674         | 0.2522         | 0.2639         |
|                    |                         | 10          | 0.2714         | 0.2627         | 0.2595         | 0.2284         | 0.2471         |
|                    |                         | 15          | 0.3342*        | 0.3029         | 0.3117         | 0.2861         | 0.3137         |
|                    |                         | 20          | 0.3724*        | 0.3418*        | 0.3453*        | 0.3054         | 0.3516*        |
|                    |                         | 25          | <b>0.5138*</b> | <b>0.5035*</b> | <b>0.4992*</b> | <b>0.4475*</b> | <b>0.4886*</b> |

**Note:** \* denotes the significant correlation between  $N_2O$  emissions and soil  $NH_4^+-N$  at different depths. Point1, point2, point3, point4, and point5 represent chamber NO 1, 2, 3, 4, and 5, respectively.

**Table S15** Correlations ( $R^2$ ) between  $N_2O$  emissions and soil  $NO_3^-$  at different depths under SDI<sub>5</sub>.

| Treatment                          | Horizontal distance(m) | Depths (cm) | Point1         | Point2         | Point3         | Point4         | Point5         |
|------------------------------------|------------------------|-------------|----------------|----------------|----------------|----------------|----------------|
| SDI <sub>5</sub> +N <sub>300</sub> | 0.07 m                 | 5           | 0.3088         | 0.2908         | 0.2735         | 0.2692         | 0.2995         |
|                                    |                        | 10          | 0.3475*        | 0.3202         | 0.3045         | 0.2979         | 0.3382*        |
|                                    |                        | 15          | <b>0.4733*</b> | <b>0.4418*</b> | <b>0.4213*</b> | <b>0.4382*</b> | <b>0.4662*</b> |
|                                    |                        | 20          | 0.4146*        | 0.3806*        | 0.3272         | 0.3464*        | 0.3835*        |
|                                    |                        | 25          | 0.3941*        | 0.3638*        | 0.2946         | 0.3339*        | 0.3867*        |
|                                    | 0.14 m                 | 5           | 0.3752*        | 0.3530*        | 0.3353*        | 0.3302         | <b>0.3686*</b> |
|                                    |                        | 10          | 0.2871         | 0.2750         | 0.2829         | 0.2716         | 0.2860         |
|                                    |                        | 15          | 0.3957*        | 0.3671*        | 0.3501*        | 0.3163         | 0.3349*        |
|                                    |                        | 20          | <b>0.4015*</b> | <b>0.3801*</b> | <b>0.3828*</b> | <b>0.3392*</b> | 0.3515*        |
|                                    |                        | 25          | 0.3969*        | 0.3688*        | 0.3445*        | 0.2874         | 0.3305         |
|                                    | 0.20 m                 | 5           | 0.3276         | 0.3112         | 0.2881         | 0.2961         | 0.3303         |
|                                    |                        | 10          | 0.2765         | 0.2551         | 0.2474         | 0.2277         | 0.2676         |
|                                    |                        | 15          | 0.2426         | 0.2188         | 0.2259         | 0.1781         | 0.2059         |
|                                    |                        | 20          | 0.3188         | 0.3055         | 0.3226         | 0.3240         | 0.3210         |
|                                    |                        | 25          | <b>0.4151*</b> | <b>0.3945*</b> | <b>0.4061*</b> | <b>0.3956*</b> | <b>0.3967*</b> |
| SDI <sub>5</sub> +N <sub>240</sub> | 0.07 m                 | 5           | 0.3164         | 0.2966         | 0.3039         | 0.2815         | 0.3241         |
|                                    |                        | 10          | 0.4391*        | 0.4309*        | 0.4666*        | 0.3932*        | 0.4559*        |
|                                    |                        | 15          | 0.3618*        | 0.3369*        | 0.3789*        | 0.3266         | 0.3766*        |
|                                    |                        | 20          | 0.4009*        | 0.3819*        | 0.4194*        | 0.3731*        | 0.4313*        |
|                                    |                        | 25          | <b>0.4748*</b> | <b>0.4675*</b> | <b>0.5292*</b> | <b>0.4420*</b> | <b>0.5144*</b> |
|                                    | 0.14 m                 | 5           | 0.3079         | 0.2919         | 0.3248         | 0.2911         | 0.3339*        |
|                                    |                        | 10          | <b>0.4069*</b> | <b>0.3930*</b> | <b>0.3978*</b> | <b>0.3765*</b> | 0.4069*        |
|                                    |                        | 15          | 0.3447*        | 0.3193         | 0.3638*        | 0.2752         | 0.3379*        |
|                                    |                        | 20          | 0.3569*        | 0.3626*        | 0.3763*        | 0.3182         | 0.3546*        |
|                                    |                        | 25          | 0.3748*        | 0.3663*        | 0.3933*        | 0.3555*        | <b>0.4169*</b> |
|                                    | 0.20 m                 | 5           | 0.3070         | 0.2940         | 0.3301         | 0.2578         | 0.3076         |
|                                    |                        | 10          | 0.2690         | 0.2343         | 0.2817         | 0.2213         | 0.2621         |
|                                    |                        | 15          | <b>0.3811*</b> | <b>0.3556*</b> | <b>0.3854*</b> | <b>0.3517*</b> | <b>0.3928*</b> |
|                                    |                        | 20          | 0.2852         | 0.2582         | 0.2663         | 0.2745         | 0.2908         |
|                                    |                        | 25          | 0.2989         | 0.2687         | 0.2828         | 0.2791         | 0.3096         |

**Note:** \* denotes the significant correlation between  $N_2O$  emissions and soil  $NO_3^-$  at different depths. Point1, point2, point3, point4, and point5 represent chamber NO 1, 2, 3, 4, and 5, respectively.

**Table S16** Correlations ( $R^2$ ) between  $N_2O$  emissions and soil  $NO_3^-$  at different depths under  $SDI_{10}$ .

| Treatment          | Horizontal distance (m) | Depths (cm) | Point1         | Point2         | Point3         | Point4         | Point5         |
|--------------------|-------------------------|-------------|----------------|----------------|----------------|----------------|----------------|
| $SDI_{10}+N_{300}$ | 0.07 m                  | 5           | 0.3104         | 0.2775         | 0.3313         | 0.2950         | 0.3287         |
|                    |                         | 10          | <b>0.4249*</b> | <b>0.3912*</b> | <b>0.4448*</b> | <b>0.3925*</b> | <b>0.4391*</b> |
|                    |                         | 15          | 0.4069*        | 0.3758*        | 0.4062*        | 0.3665*        | 0.3794*        |
|                    |                         | 20          | 0.2321         | 0.1972         | 0.2426         | 0.2095         | 0.2347         |
|                    |                         | 25          | 0.1787         | 0.1607         | 0.1983         | 0.1687         | 0.1889         |
|                    | 0.14 m                  | 5           | 0.3291         | 0.3195         | 0.3476*        | 0.3180         | 0.3473*        |
|                    |                         | 10          | 0.4165*        | 0.4041*        | <b>0.4238*</b> | 0.3834*        | <b>0.4230*</b> |
|                    |                         | 15          | 0.2706         | 0.2569         | 0.2899         | 0.2605         | 0.2896         |
|                    |                         | 20          | <b>0.4367*</b> | <b>0.4179*</b> | 0.4232*        | <b>0.3909*</b> | 0.4158*        |
|                    |                         | 25          | 0.3303         | 0.3283         | 0.3067         | 0.2876         | 0.2735         |
|                    | 0.20 m                  | 5           | <b>0.2988</b>  | <b>0.2833</b>  | <b>0.3178</b>  | <b>0.2849</b>  | <b>0.3140</b>  |
|                    |                         | 10          | 0.2718         | 0.2531         | 0.2960         | 0.2636         | 0.3032         |
|                    |                         | 15          | 0.2524         | 0.2481         | 0.2565         | 0.2319         | 0.2393         |
|                    |                         | 20          | 0.2798         | 0.2484         | 0.2822         | 0.2355         | 0.2703         |
|                    |                         | 25          | 0.2188         | 0.1953         | 0.2167         | 0.1828         | 0.1945         |
| $SDI_{10}+N_{240}$ | 0.07 m                  | 5           | <b>0.4368*</b> | <b>0.4096*</b> | <b>0.4191*</b> | <b>0.4465*</b> | <b>0.4466*</b> |
|                    |                         | 10          | 0.3514*        | 0.3342*        | 0.3254         | 0.3454*        | 0.3446*        |
|                    |                         | 15          | 0.2356         | 0.2047         | 0.2144         | 0.2237         | 0.2184         |
|                    |                         | 20          | 0.3985*        | 0.3521*        | 0.3797*        | 0.3887*        | 0.3949*        |
|                    |                         | 25          | 0.3286         | 0.2976         | 0.3057         | 0.3376*        | 0.3196         |
|                    | 0.14 m                  | 5           | 0.3887*        | 0.3642*        | 0.3618*        | 0.3745*        | 0.3819*        |
|                    |                         | 10          | <b>0.4342*</b> | <b>0.4066*</b> | <b>0.4084*</b> | <b>0.4219*</b> | <b>0.4210*</b> |
|                    |                         | 15          | 0.3615*        | 0.3210         | 0.3383*        | 0.3517*        | 0.3448*        |
|                    |                         | 20          | 0.3943*        | 0.3658*        | 0.3647*        | 0.3791*        | 0.3686*        |
|                    |                         | 25          | 0.3272         | 0.2849         | 0.3001         | 0.3180         | 0.2999         |
|                    | 0.20 m                  | 5           | 0.2564         | 0.2345         | 0.2223         | 0.2401         | 0.2289         |
|                    |                         | 10          | 0.4109*        | 0.3914*        | 0.3635*        | 0.3851*        | 0.3633*        |
|                    |                         | 15          | 0.2903         | 0.2560         | 0.2558         | 0.2663         | 0.2393         |
|                    |                         | 20          | <b>0.4546*</b> | <b>0.4281*</b> | <b>0.4364*</b> | <b>0.4577*</b> | <b>0.4632*</b> |
|                    |                         | 25          | 0.3999*        | 0.3918*        | 0.3602*        | 0.3923*        | 0.3725*        |

**Note:** \* denotes the significant correlation between  $N_2O$  emissions and soil  $NO_3^-$  at different depths. Point1, point2, point3, point4, and point5 represent chamber NO 1, 2, 3, 4, and 5, respectively.

**Table S17** Correlations ( $R^2$ ) between  $N_2O$  emissions and soil  $NO_3^-$  at different depths under  $SDI_{15}$ .

| Treatment          | Horizontal distance (m) | Depths (cm) | Point1         | Point2         | Point3         | Point4         | Point5         |
|--------------------|-------------------------|-------------|----------------|----------------|----------------|----------------|----------------|
| $SDI_{15}+N_{300}$ | 0.07 m                  | 5           | 0.3401*        | 0.3355*        | 0.3266         | 0.2952         | 0.2974         |
|                    |                         | 10          | 0.2629         | 0.2570         | 0.2601         | 0.2327         | 0.2558         |
|                    |                         | 15          | 0.3789*        | 0.3839*        | 0.3505*        | 0.3047         | 0.3309         |
|                    |                         | 20          | 0.2651         | 0.2616         | 0.2664         | 0.2278         | 0.2566         |
|                    |                         | 25          | <b>0.4273*</b> | <b>0.4527*</b> | <b>0.4424*</b> | <b>0.4158*</b> | <b>0.4037*</b> |
|                    | 0.14 m                  | 5           | 0.4068*        | 0.3964*        | 0.3977*        | 0.3530*        | 0.3777*        |
|                    |                         | 10          | 0.3608*        | 0.3510*        | 0.3412*        | 0.3043         | 0.3309         |
|                    |                         | 15          | <b>0.4415*</b> | <b>0.4151*</b> | <b>0.4260*</b> | <b>0.3636*</b> | <b>0.4121*</b> |
|                    |                         | 20          | 0.3828*        | 0.3731*        | 0.3563*        | 0.3381*        | 0.3437*        |
|                    |                         | 25          | 0.3023         | 0.3051         | 0.3008         | 0.2579         | 0.2641         |
|                    | 0.20 m                  | 5           | 0.2781         | 0.2705         | 0.2681         | 0.2486         | 0.2544         |
|                    |                         | 10          | <b>0.3854*</b> | <b>0.4045*</b> | <b>0.3709*</b> | <b>0.3560*</b> | <b>0.3450*</b> |
|                    |                         | 15          | 0.3414*        | 0.3458*        | 0.3037         | 0.3026         | 0.2884         |
|                    |                         | 20          | 0.3157         | 0.3102         | 0.2942         | 0.2877         | 0.2732         |
|                    |                         | 25          | 0.0645         | 0.0457         | 0.0673         | 0.0248         | 0.0530         |
| $SDI_{15}+N_{240}$ | 0.07 m                  | 5           | 0.3575*        | 0.3441*        | 0.3521*        | 0.3038         | 0.3318*        |
|                    |                         | 10          | 0.2306         | 0.2313         | 0.2308         | 0.1846         | 0.2104         |
|                    |                         | 15          | 0.3397*        | 0.3545*        | 0.3265         | 0.3303         | 0.2895         |
|                    |                         | 20          | 0.3581*        | 0.3575*        | 0.3791*        | 0.3346*        | <b>0.3835*</b> |
|                    |                         | 25          | <b>0.3893*</b> | <b>0.3957*</b> | <b>0.3849*</b> | <b>0.3463*</b> | 0.3760*        |
|                    | 0.14 m                  | 5           | 0.3439*        | 0.3485*        | 0.3308         | 0.3270         | 0.3077         |
|                    |                         | 10          | 0.2646         | 0.2679         | 0.2487         | 0.2239         | 0.2254         |
|                    |                         | 15          | <b>0.4340*</b> | <b>0.4384*</b> | 0.4333*        | 0.3834*        | 0.4079*        |
|                    |                         | 20          | 0.4310*        | 0.4321*        | <b>0.4394*</b> | <b>0.3947*</b> | <b>0.4127*</b> |
|                    |                         | 25          | 0.2974         | 0.2859         | 0.2975         | 0.2751         | 0.2933         |
|                    | 0.20 m                  | 5           | <b>0.3461*</b> | <b>0.3504*</b> | <b>0.3340*</b> | <b>0.3307</b>  | <b>0.3137</b>  |
|                    |                         | 10          | 0.2838         | 0.2873         | 0.2734         | 0.2580         | 0.2452         |
|                    |                         | 15          | 0.2815         | 0.2774         | 0.2756         | 0.2002         | 0.2567         |
|                    |                         | 20          | 0.2108         | 0.2059         | 0.1955         | 0.1687         | 0.1868         |
|                    |                         | 25          | 0.1730         | 0.1711         | 0.1502         | 0.1670         | 0.1384         |

**Note:** \* denotes the significant correlation between  $N_2O$  emissions and soil  $NO_3^-$  at different depths. Point1, point2, point3, point4, and point5 represent chamber NO 1, 2, 3, 4, and 5, respectively.
